# Supplementary material for: Chronic Aripiprazole and Trazodone Polypharmacy Effects on Systemic and Brain Cholesterol Biosynthesis
Source: MDPI journal article supplement (doi:10.3390/biom13091321), 2023-08-28
Supplement: s1 [file s1]

Figure S1.

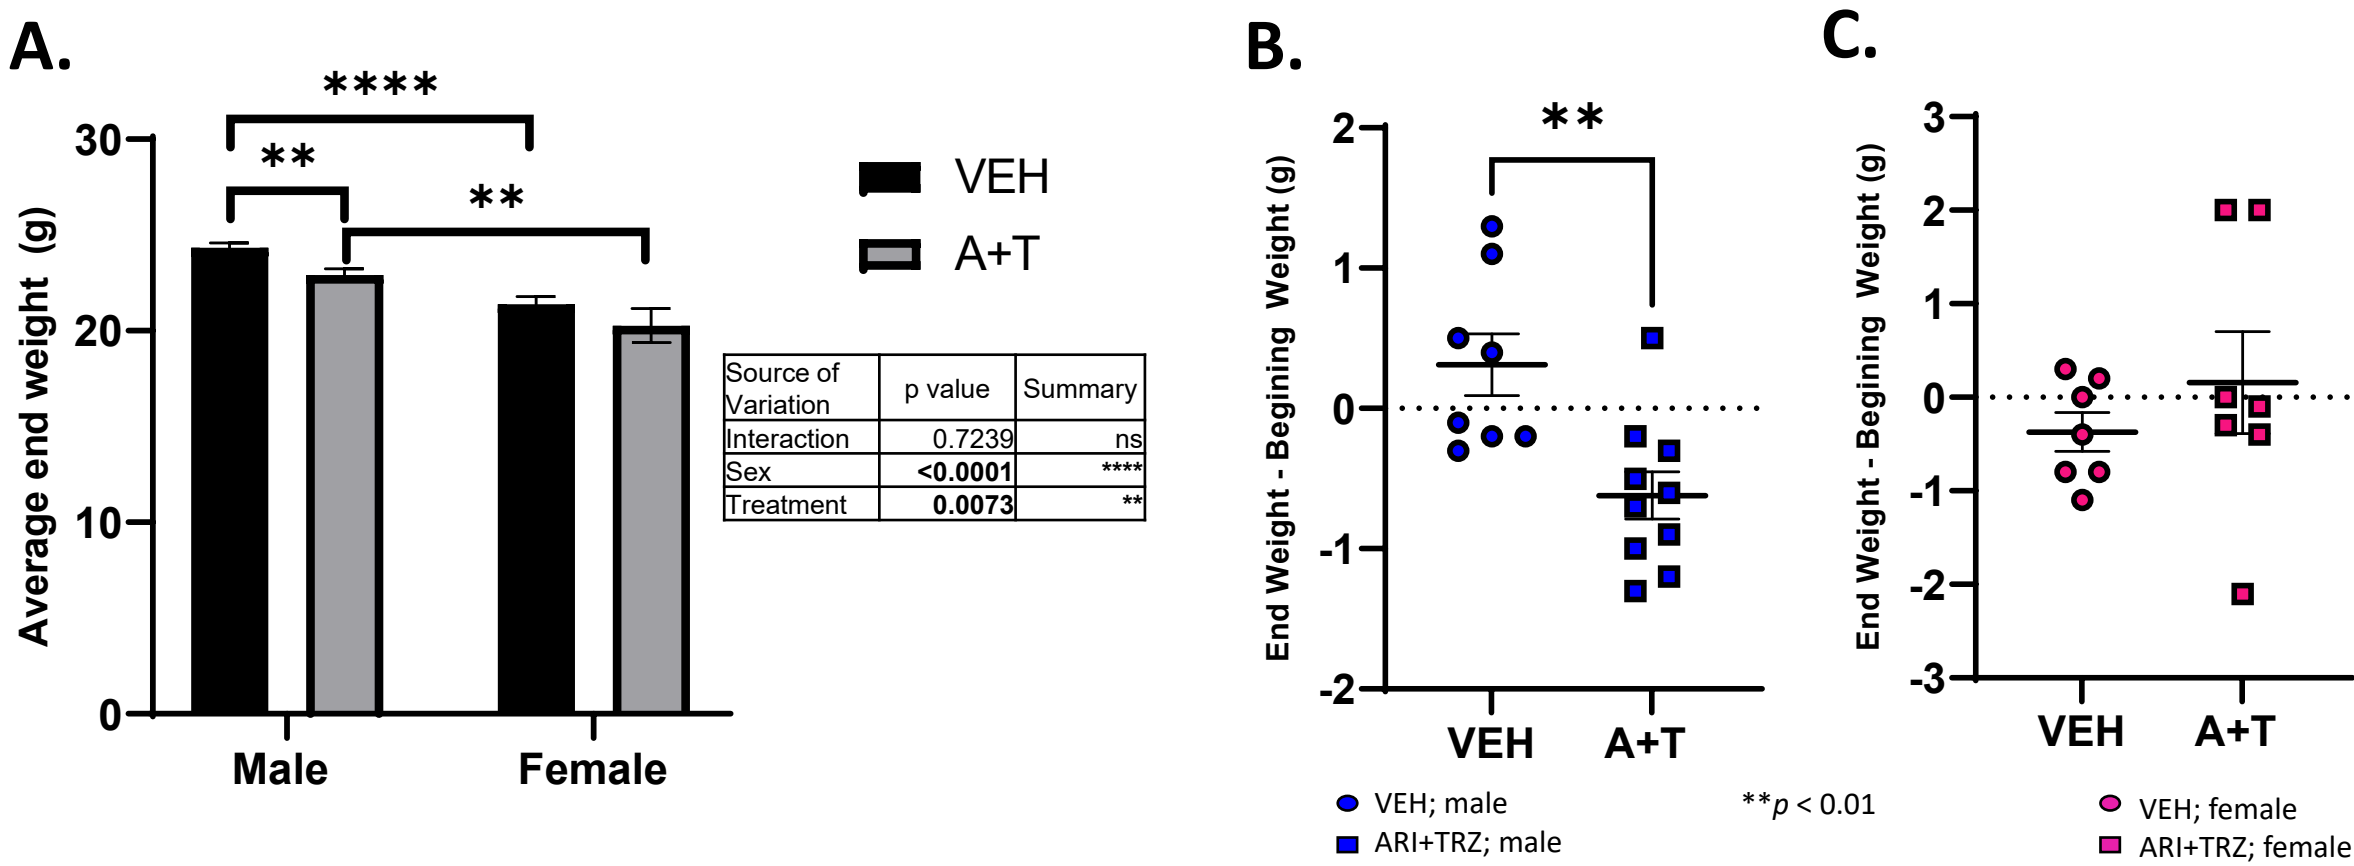

Table S1.

|                         | VEH     |        |   | ARI + TRZ |        |    |                  |
|-------------------------|---------|--------|---|-----------|--------|----|------------------|
| <b>A. Mouse Weights</b> | Mean    | SEM    | N | Mean      | SEM    | N  | t-test           |
| male (grams)            | 24.3375 | 0.0685 | 8 | 22.91     | 0.9586 | 10 | <b>0.0041</b> ** |
| female (grams)          | 21.3857 | 0.9906 | 7 | 20.2714   | 2.1618 | 7  | 0.2734           |

  

|                        | VEH     |        |   | VEH     |        |   | t-test                 |
|------------------------|---------|--------|---|---------|--------|---|------------------------|
| male vs female (grams) | 24.3375 | 0.0685 | 8 | 21.3857 | 0.9906 | 7 | <b>&lt;0.0001</b> **** |

  

|                        | ARI + TRZ |        |    | ARI + TRZ |        |   | t-test           |
|------------------------|-----------|--------|----|-----------|--------|---|------------------|
| male vs female (grams) | 22.9100   | 0.9586 | 10 | 20.2714   | 2.1618 | 7 | <b>0.0059</b> ** |

  

|                              | VEH     |        |   | ARI + TRZ |        |    |                  |
|------------------------------|---------|--------|---|-----------|--------|----|------------------|
| <b>B. Delta mouse weight</b> | Mean    | SEM    | N | Mean      | SEM    | N  | t-test           |
| male (grams)                 | 0.3130  | 0.2200 | 8 | -0.6200   | 0.1690 | 10 | <b>0.0035</b> ** |
| female (grams)               | -0.3710 | 0.2080 | 7 | 0.1570    | 0.5450 | 7  | 0.3830           |

Table S1. Mouse weights.

A. Serum

Figure S2.

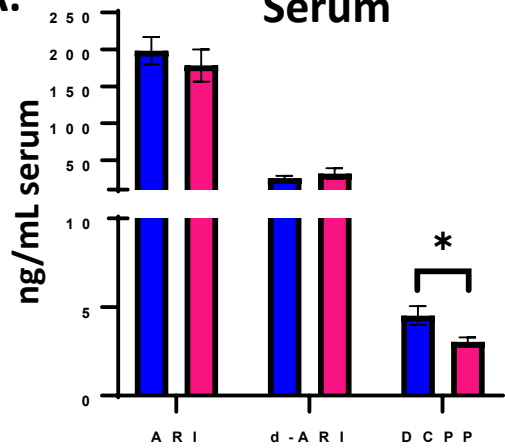

| Source of Variation  | p value | summary |
|----------------------|---------|---------|
| Interaction          | 0.5503  | ns      |
| Drug and metabolites | <0.0001 | ****    |
| Sex                  | 0.5981  | ns      |

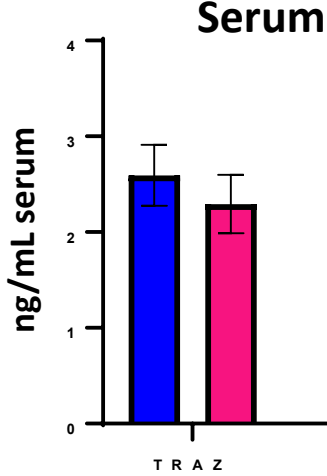

| Source of Variation | p value | summary |
|---------------------|---------|---------|
| Interaction         | 0.4182  | ns      |
| Drug and metabolite | 0.5726  | ns      |
| Sex                 | 0.0597  | ns      |

B. Liver

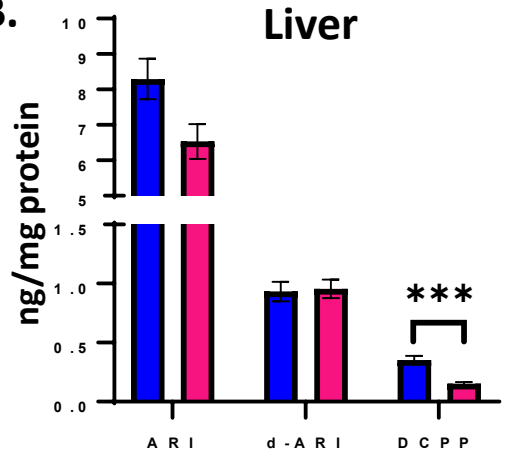

| Source of Variation  | p value | summary |
|----------------------|---------|---------|
| Interaction          | 0.0219  | *       |
| Drug and metabolites | <0.0001 | ****    |
| Sex                  | 0.0228  | *       |

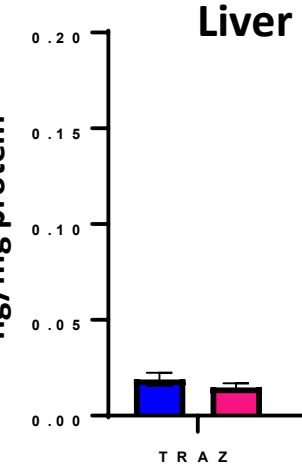

| Source of Variation | p value | summary |
|---------------------|---------|---------|
| Interaction         | 0.0003  | ***     |
| Drug and metabolite | <0.0001 | ****    |
| Sex                 | <0.0001 | ****    |

C. Spleen

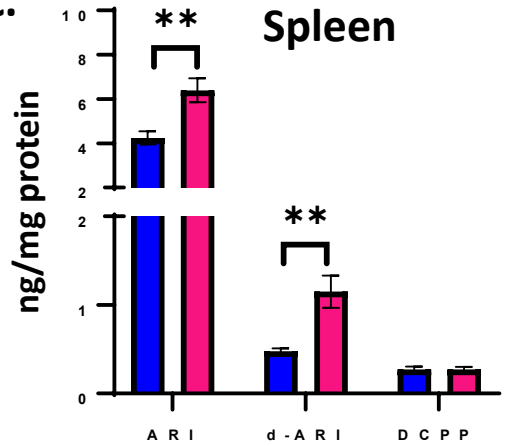

| Source of Variation  | p value | summary |
|----------------------|---------|---------|
| Interaction          | 0.0004  | ***     |
| Drug and metabolites | <0.0001 | ****    |
| Sex                  | <0.0001 | ****    |

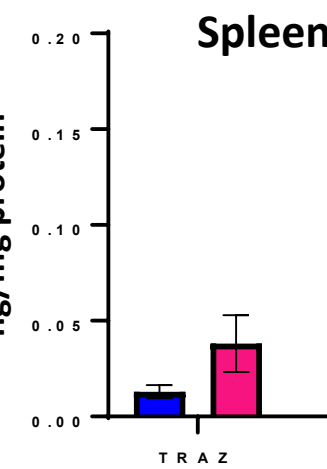

| Source of Variation | p value | summary |
|---------------------|---------|---------|
| Interaction         | 0.9438  | ns      |
| Drug and metabolite | <0.0001 | ****    |
| Sex                 | 0.0861  | ns      |

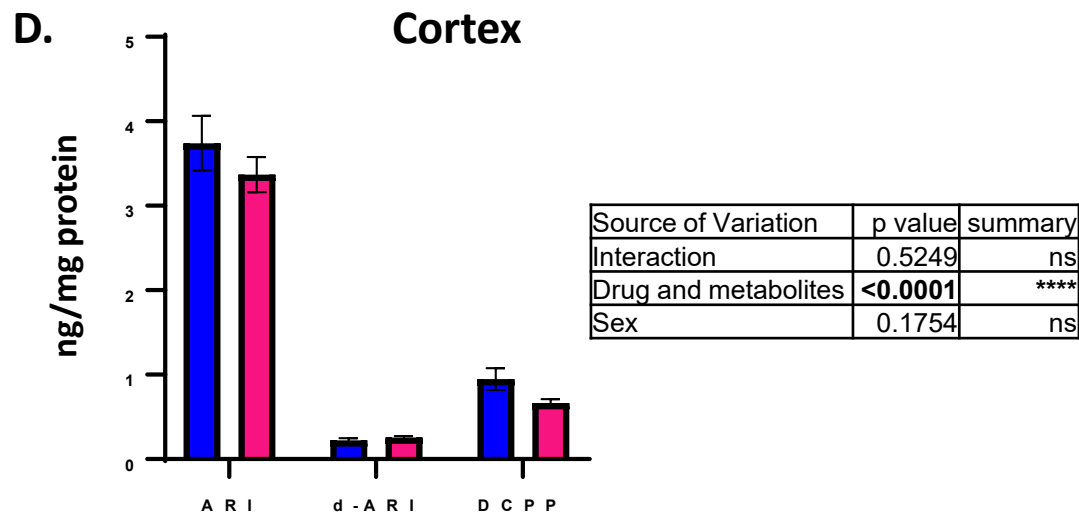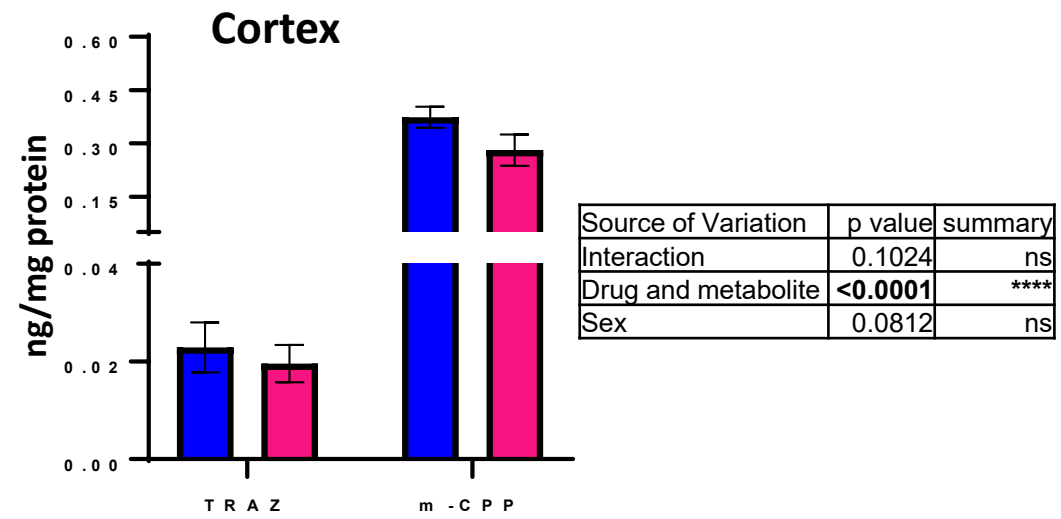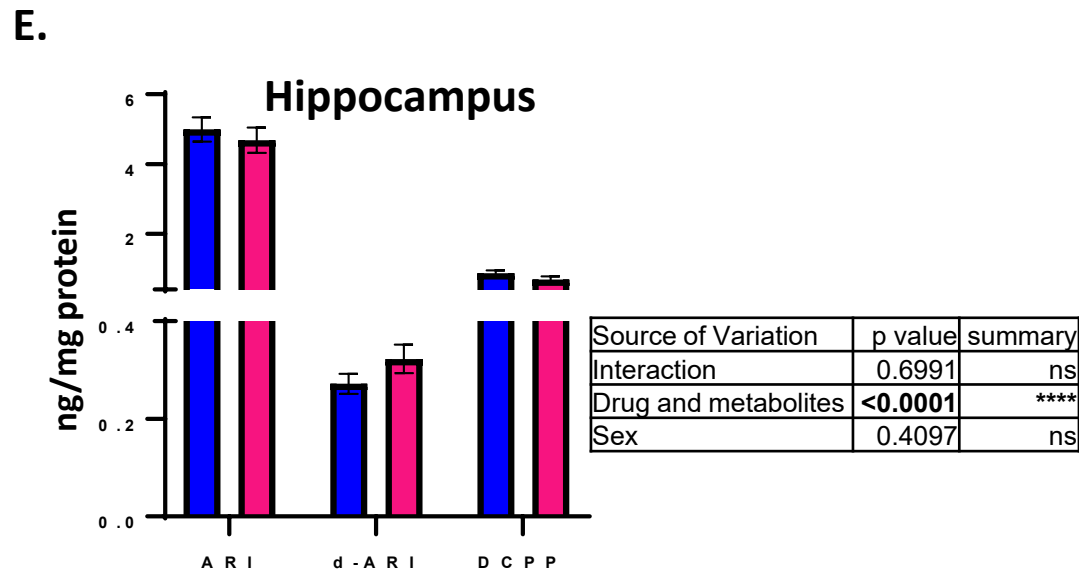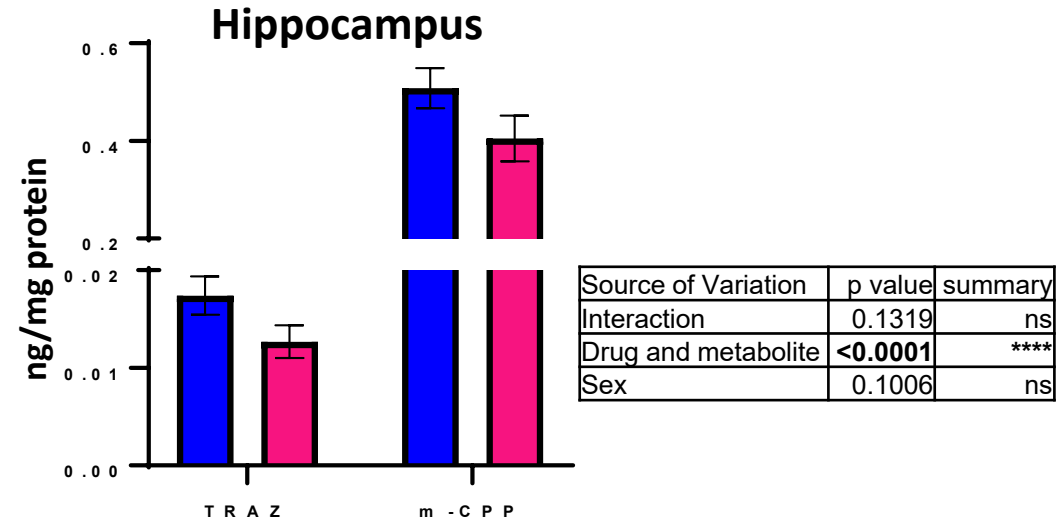

**Figure S2. Aripiprazole with its metabolites and trazadone with its metabolite in serum and organs.** Average ARI, d-ARI, DCPP TRZ, and m-CPP in males (blue) and females (red) exposed to ARI + TRZ for 21 days with 2-way ANOVA. A) Serum. B) Liver. C) Spleen. D) Cortex. E) Hippocampus. Statistical details are in Table S2.

Table S2.

| Supplemental Table 2. |          |          |   |          |          |   |               |
|-----------------------|----------|----------|---|----------|----------|---|---------------|
| Drug and metabolites  |          |          |   |          |          |   |               |
| A. Serum              | Male     |          |   | Female   |          |   | t-test        |
|                       | Mean     | SEM      | N | Mean     | SEM      | N |               |
| ARI                   | 198.4275 | 18.51573 | 5 | 178.2413 | 21.83032 | 5 | 0.5007        |
| d-ARI                 | 25.9348  | 2.812522 | 5 | 31.75601 | 7.309506 | 5 | 0.4786        |
| DCPP                  | 4.521948 | 0.532209 | 5 | 3.029276 | 0.266929 | 5 | <b>0.0365</b> |
| TRZ                   | 2.592502 | 0.317946 | 5 | 2.291929 | 0.305047 | 5 | 0.5144        |
| m-CPP                 | 2.656606 | 0.220812 | 5 | 1.938147 | 0.099891 | 5 | <b>0.018</b>  |
| B. Liver              |          |          |   |          |          |   |               |
|                       | Mean     | SEM      | N | Mean     | SEM      | N | t-test        |
| ARI                   | 8.29639  | 0.574082 | 7 | 6.532194 | 0.488176 | 5 | 0.0517        |
| d-ARI                 | 0.932552 | 0.083375 | 7 | 0.956004 | 0.078767 | 5 | 0.8483        |
| DCPP                  | 0.353251 | 0.03387  | 7 | 0.153476 | 0.012421 | 5 | <b>0.0008</b> |
| TRZ                   | 0.018997 | 0.003472 | 7 | 0.014792 | 0.002055 | 5 | 0.3721        |
| m-CPP                 | 0.151327 | 0.00736  | 7 | 0.099285 | 0.005533 | 5 | <b>0.0004</b> |
| C. Spleen             |          |          |   |          |          |   |               |
|                       | Mean     | SEM      | N | Mean     | SEM      | N | t-test        |
| ARI                   | 4.24814  | 0.295182 | 7 | 6.395561 | 0.542897 | 5 | <b>0.0038</b> |
| d-ARI                 | 0.4768   | 0.033389 | 7 | 1.151228 | 0.181938 | 5 | <b>0.0015</b> |
| DCPP                  | 0.27137  | 0.033933 | 7 | 0.270561 | 0.028594 | 5 | 0.9866        |
| TRZ                   | 0.012984 | 0.003413 | 7 | 0.038095 | 0.014815 | 5 | 0.0809        |
| m-CPP                 | 0.132545 | 0.015146 | 7 | 0.155746 | 0.017851 | 5 | 0.3454        |
| D. Cortex             |          |          |   |          |          |   |               |
|                       | Mean     | SEM      | N | Mean     | SEM      | N | t-test        |
| ARI                   | 3.741342 | 0.321441 | 7 | 3.368334 | 0.208558 | 5 | 0.4640        |
| d-ARI                 | 0.224507 | 0.023396 | 7 | 0.254657 | 0.019557 | 5 | 0.4167        |
| DCPP                  | 0.948305 | 0.128026 | 7 | 0.663347 | 0.045321 | 5 | 0.1340        |
| TRZ                   | 0.02285  | 0.005115 | 6 | 0.019558 | 0.00381  | 5 | 0.6576        |
| m-CPP                 | 0.373692 | 0.029433 | 6 | 0.280919 | 0.044326 | 5 | 0.1195        |
| E. Hippocampus        |          |          |   |          |          |   |               |
|                       | Mean     | SEM      | N | Mean     | SEM      | N | t-test        |
| ARI                   | 4.993539 | 0.347217 | 7 | 4.681363 | 0.363649 | 5 | 0.5572        |
| d-ARI                 | 0.271794 | 0.020703 | 7 | 0.322675 | 0.029317 | 5 | 0.1737        |
| DCPP                  | 0.868674 | 0.077229 | 7 | 0.687621 | 0.091685 | 5 | 0.1617        |
| TRZ                   | 0.017395 | 0.001962 | 7 | 0.012677 | 0.001682 | 5 | 0.1152        |
| m-CPP                 | 0.508085 | 0.04104  | 7 | 0.40506  | 0.046523 | 5 | 0.1304        |

Table S2. Drugs and metabolites in serum and organs.

Figure S3.

**Figure S3. Comparison of ARI and TRZ turnover in males and females across tissues.** A) D-ARI/ARI ratio is higher in females than in males in all organs. The serum values did not reach statistical significance but showed the same trend as in other organs. B) DCP/ARI ratio is higher in males than in females. The hippocampus values did not reach statistical significance but showed the same trend as in other organs. C) m-CPP/TRZ ratio is similar in males and females across all organs. Statistical details are in Table S3.

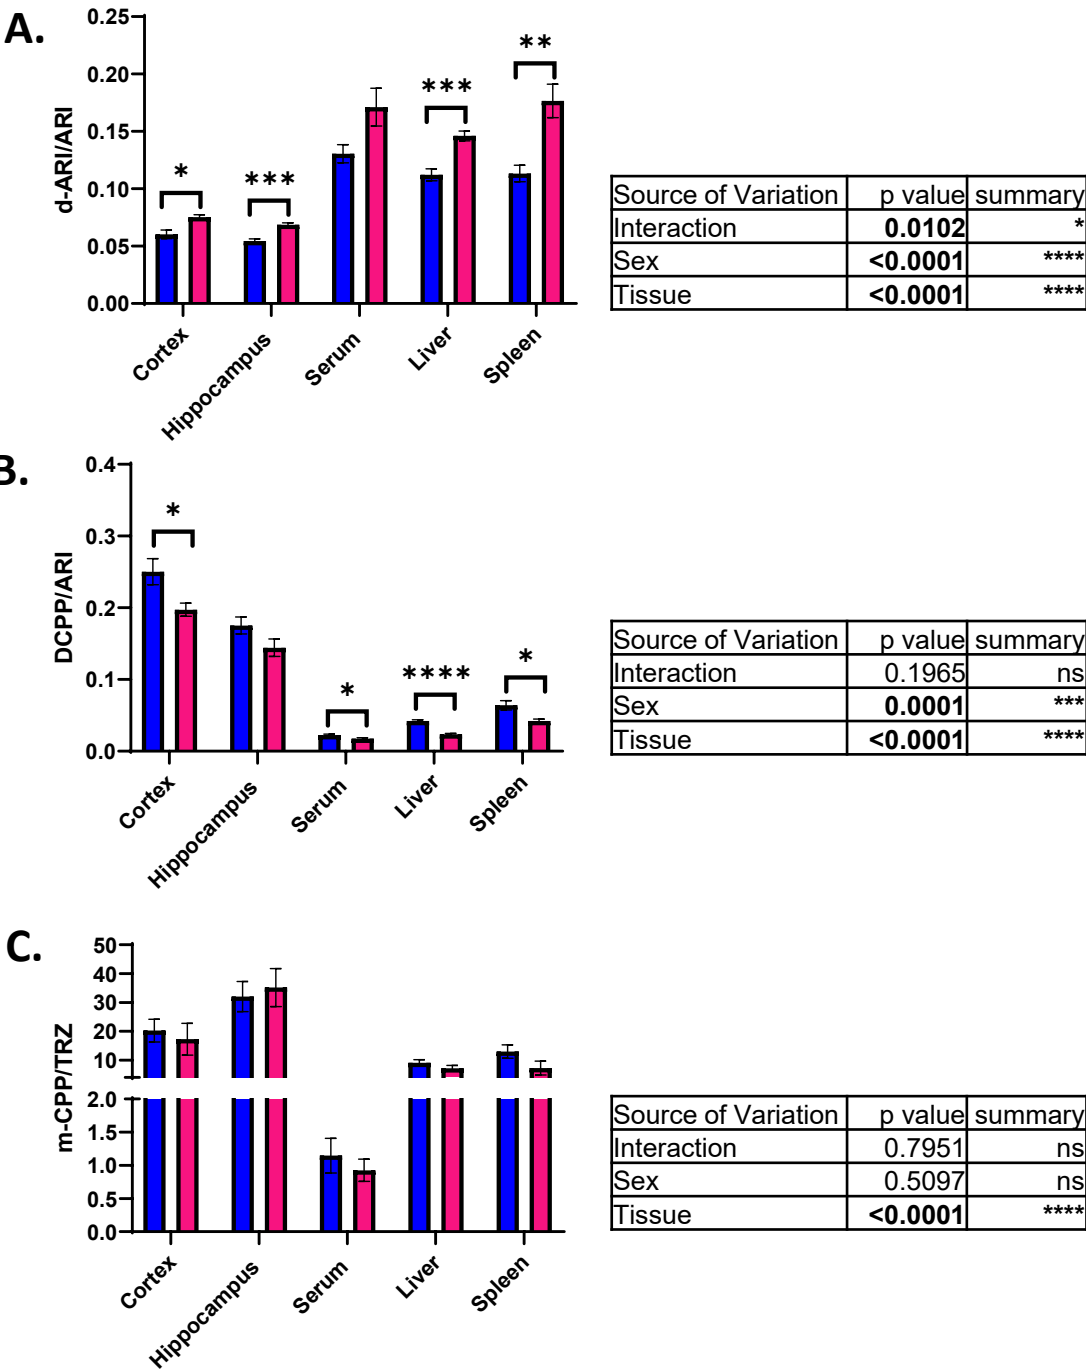

Table S3.

| Drug Turnover (au) | Male   |        |   | Female |        |   | t-test        |
|--------------------|--------|--------|---|--------|--------|---|---------------|
| <b>A. Serum</b>    | Mean   | SEM    | N | Mean   | SEM    | N |               |
| d-ARI/ARI          | 0.1305 | 0.0079 | 5 | 0.1711 | 0.0164 | 5 | 0.0566        |
| DCPP/ARI           | 0.0226 | 0.0011 | 5 | 0.0174 | 0.0014 | 5 | <b>0.0198</b> |
| d-ARI+DCPP/ARI     | 0.1531 | 0.0074 | 5 | 0.1886 | 0.0153 | 5 | 0.0711        |
| m-CPP/TRZ          | 1.1474 | 0.2612 | 5 | 0.9257 | 0.1681 | 5 | 0.4957        |

  

| <b>B. Liver</b> | Mean   | SEM    | N | Mean   | SEM    | N | t-test            |
|-----------------|--------|--------|---|--------|--------|---|-------------------|
| d-ARI/ARI       | 0.1122 | 0.0052 | 7 | 0.1461 | 0.0042 | 5 | <b>0.0009</b>     |
| DCPP/ARI        | 0.0421 | 0.0017 | 7 | 0.0235 | 0.0013 | 5 | <b>&lt;0.0001</b> |
| d-ARI+DCPP/ARI  | 0.1544 | 0.0051 | 7 | 0.1696 | 0.0055 | 5 | 0.0726            |
| m-CPP/TRZ       | 9.0809 | 1.1129 | 7 | 7.2052 | 0.9435 | 5 | 0.2533            |

  

| <b>C. Spleen</b> | Mean    | SEM    | N | Mean   | SEM    | N | t-test        |
|------------------|---------|--------|---|--------|--------|---|---------------|
| d-ARI/ARI        | 0.1133  | 0.0072 | 7 | 0.1766 | 0.0146 | 5 | <b>0.0016</b> |
| DCPP/ARI         | 0.0640  | 0.0065 | 7 | 0.0422 | 0.0027 | 5 | <b>0.0231</b> |
| d-ARI+DCPP/ARI   | 0.1773  | 0.0095 | 7 | 0.2188 | 0.0144 | 5 | <b>0.0305</b> |
| m-CPP/TRZ        | 13.0021 | 2.3042 | 7 | 7.2849 | 2.3885 | 5 | 0.1235        |

  

| <b>D. Cortex</b> | Mean    | SEM    | N | Mean    | SEM    | N | t-test        |
|------------------|---------|--------|---|---------|--------|---|---------------|
| d-ARI/ARI        | 0.0603  | 0.0038 | 7 | 0.0754  | 0.0020 | 5 | <b>0.0113</b> |
| DCPP/ARI         | 0.2503  | 0.0181 | 7 | 0.1973  | 0.0091 | 5 | <b>0.0441</b> |
| d-ARI+DCPP/ARI   | 0.3106  | 0.0211 | 7 | 0.2727  | 0.0084 | 5 | 0.1798        |
| m-CPP/TRZ        | 20.2527 | 3.9339 | 6 | 17.2839 | 5.5079 | 5 | 0.6637        |

  

| <b>E. Hippocampus</b> | Mean    | SEM    | N | Mean    | SEM    | N | t-test        |
|-----------------------|---------|--------|---|---------|--------|---|---------------|
| d-ARI/ARI             | 0.0544  | 0.0020 | 7 | 0.0686  | 0.0016 | 5 | <b>0.0004</b> |
| DCPP/ARI              | 0.1753  | 0.0120 | 7 | 0.1443  | 0.0122 | 5 | 0.1073        |
| d-ARI+DCPP/ARI        | 0.2297  | 0.0121 | 7 | 0.2129  | 0.0132 | 5 | 0.3753        |
| m-CPP/TRZ             | 32.0681 | 5.2047 | 7 | 35.1763 | 6.6177 | 5 | 0.7162        |

Table S3. Drugs turnover in serum and organs.

Figure S4.

**Figure S4. 7-DHC fold increase in response to ARI+TRZ exposure.** Compared to the levels of 7-DHC in VEH exposed mice, the levels of 7-DHC in ARI+TRZ exposed mice were significantly increased in all analyzed tissues.

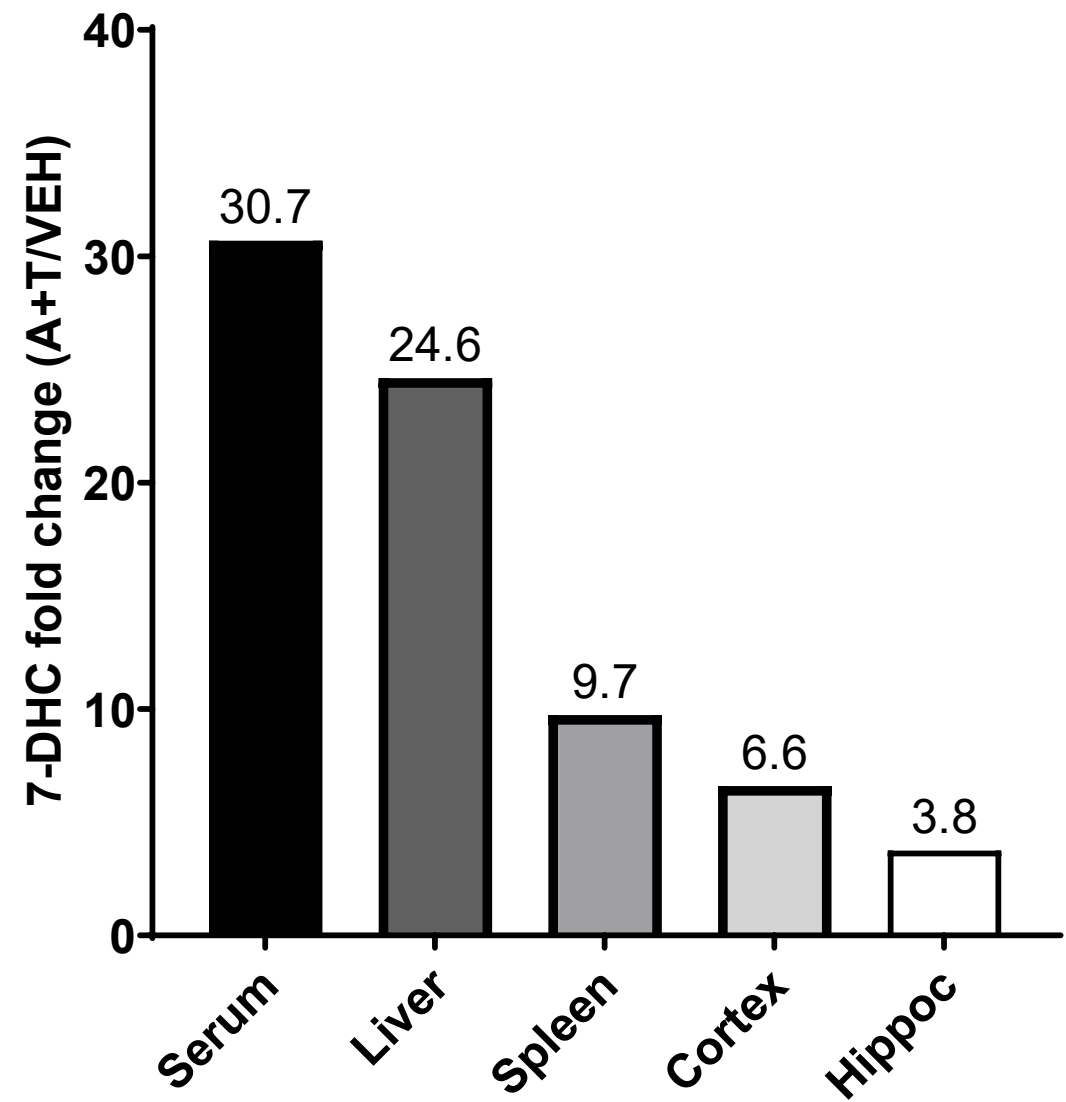



Serum

Figure S5.

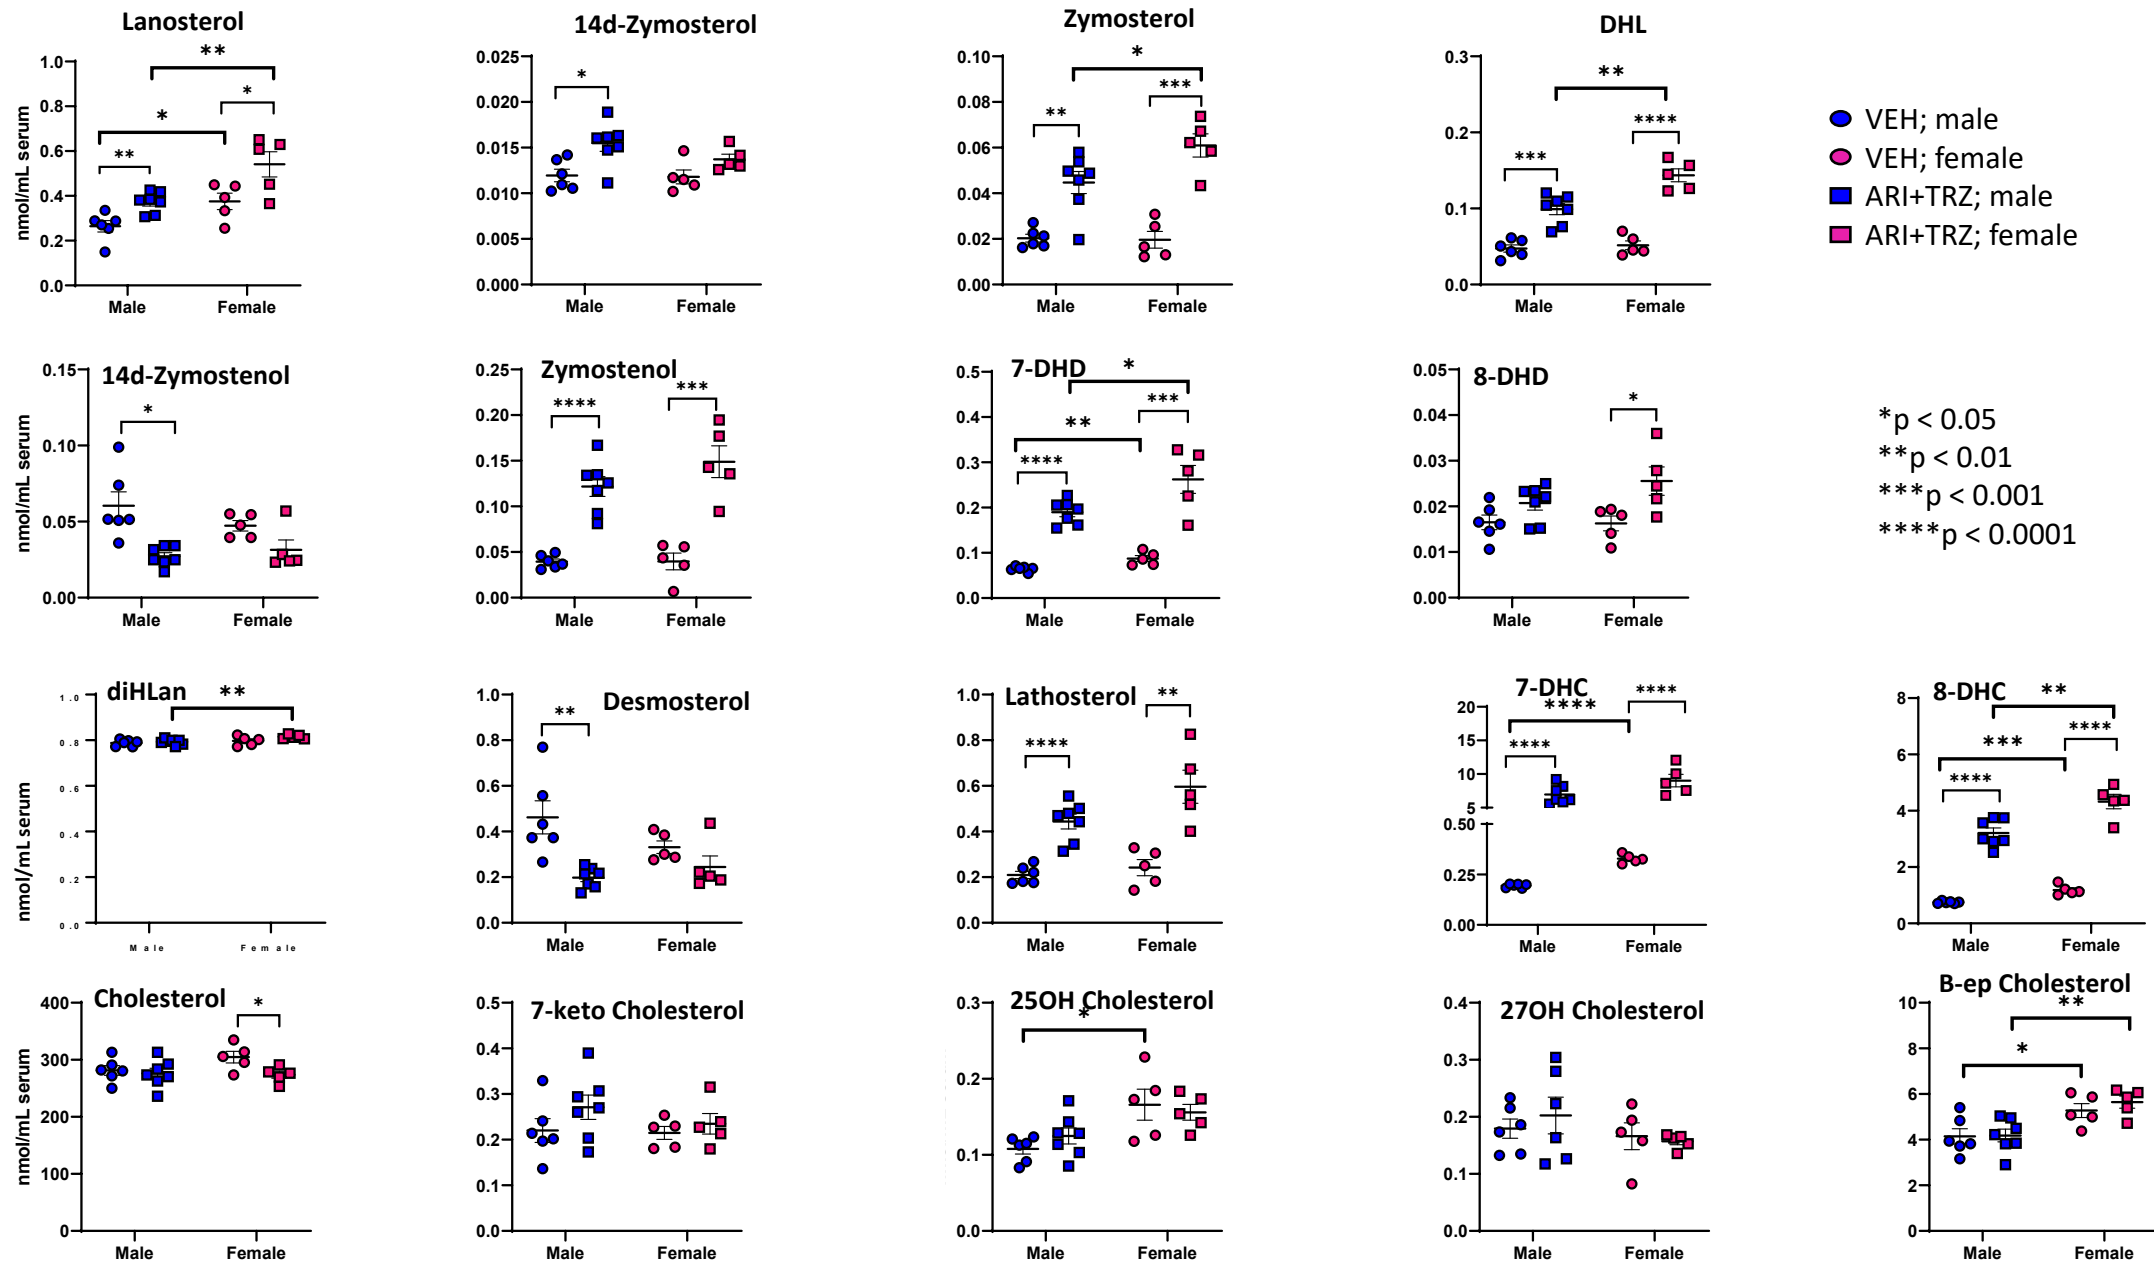

**Figure S5. Comparison of sterols and oxysterols between males and females within the serum.** Graphs show levels of sterols and oxysterols in males (blue) and females (red) under control (circles) and experimental (squares) conditions. Two-tailed unpaired t-tests were used to determine significance.

Liver

Figure S6.

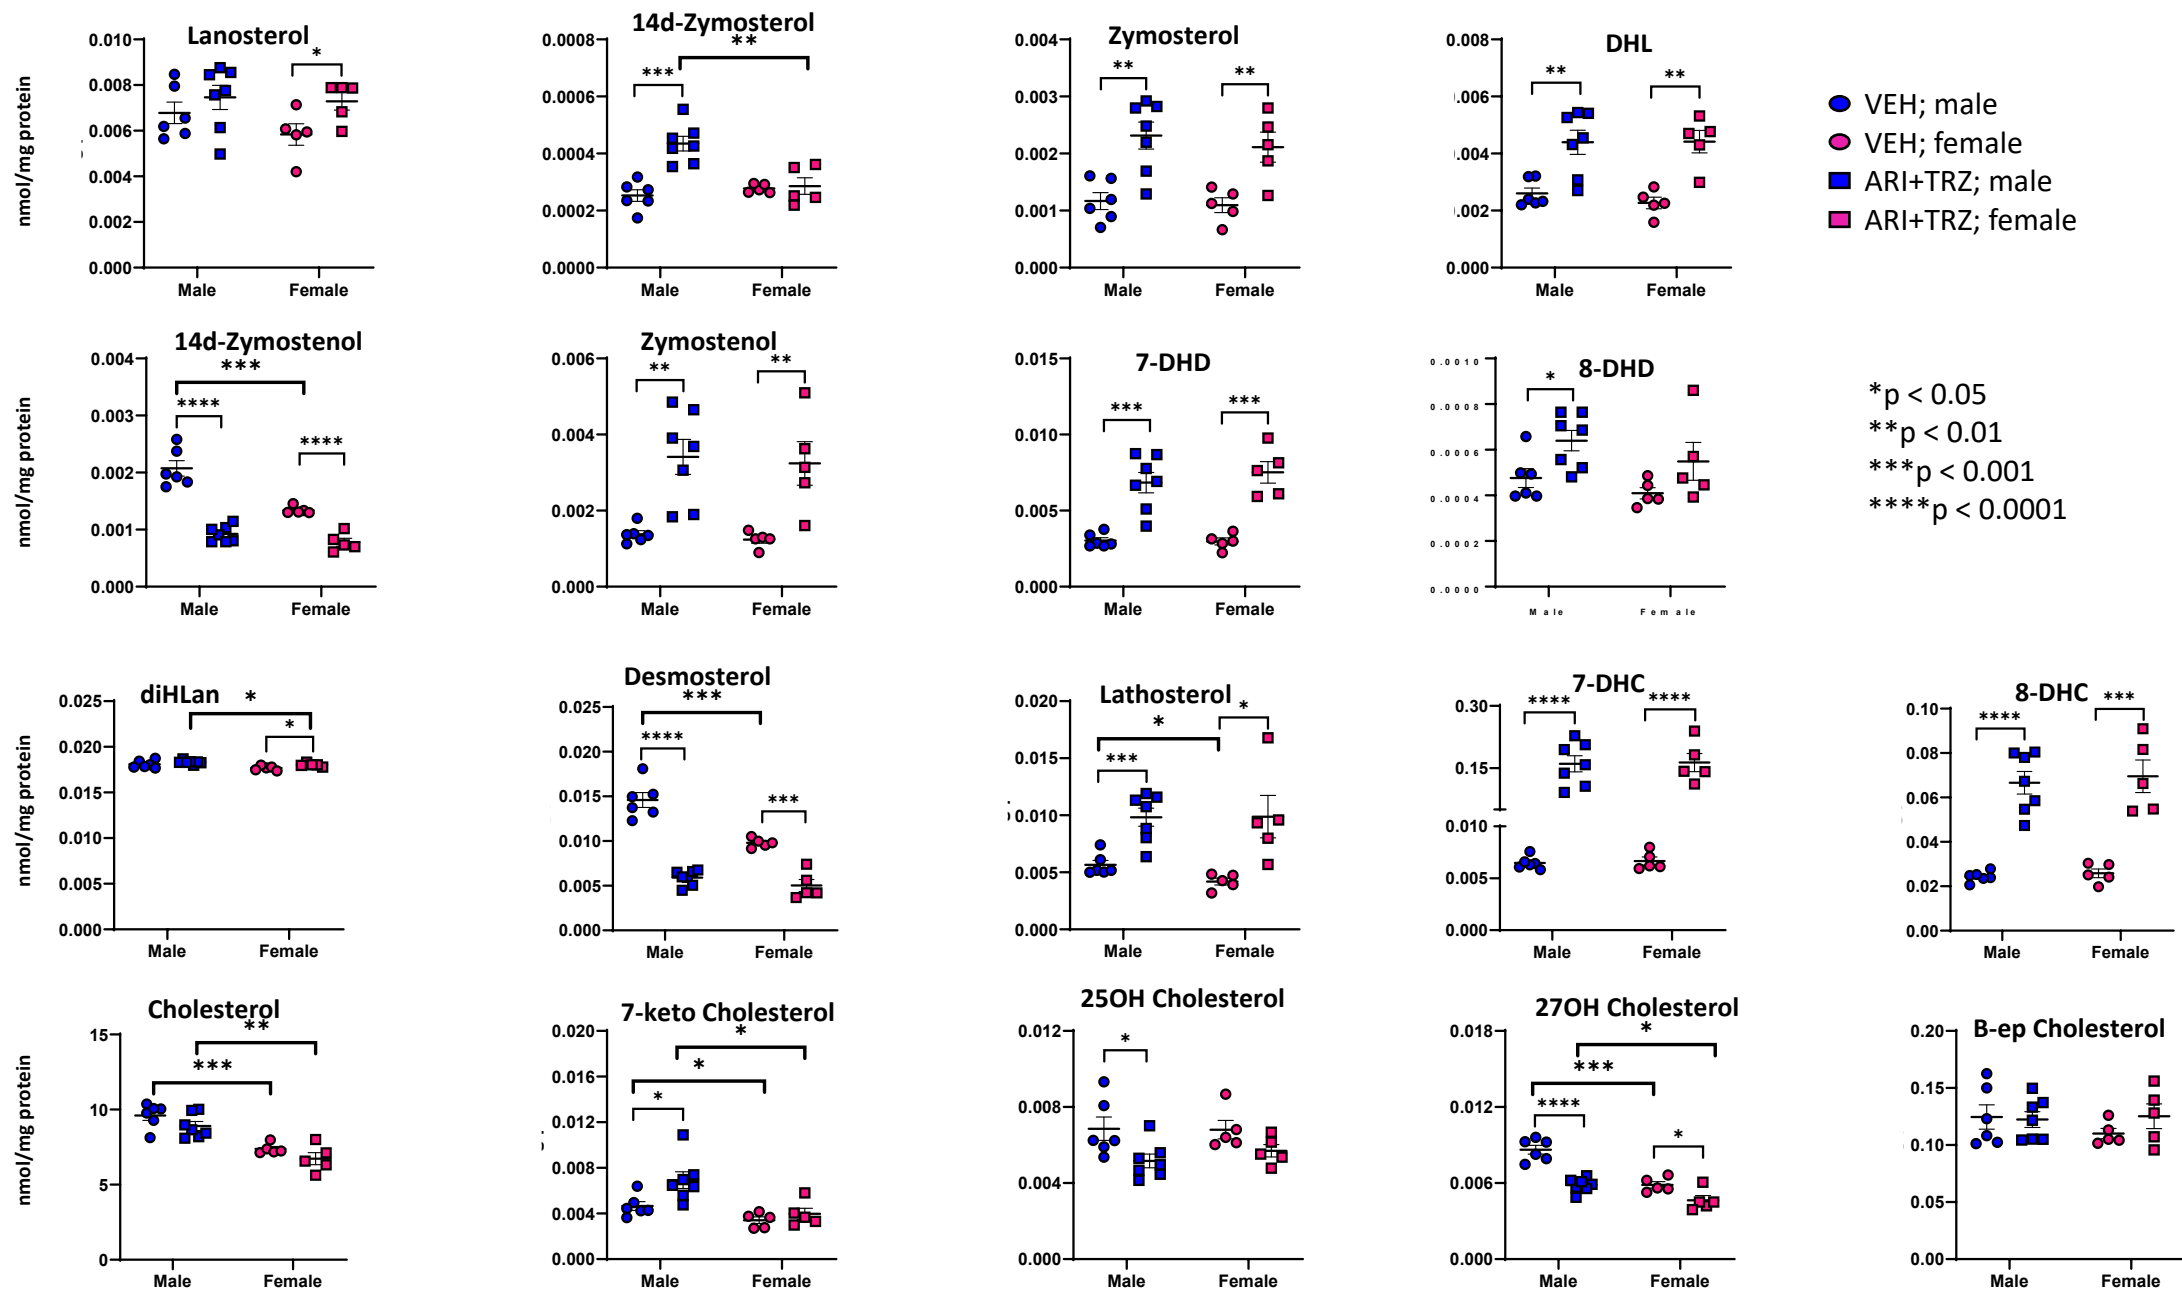

**Figure S6. Comparison of sterols and oxysterols between males and females within liver.** Graphs show levels of sterols and oxysterols in males (blue) and females (red) under control (circles) and experimental (squares) conditions. Two-tailed unpaired t-tests were used to determine significance.

Figure S7.

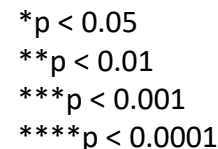

**Figure S7. Comparison of sterols and oxysterols between males and females within spleen.** Graphs show levels of sterols and oxysterols in males (blue) and females (red) under control (circles) and experimental (squares) conditions. Two-tailed unpaired t-tests were used to determine significance.

Figure S8. Cortex

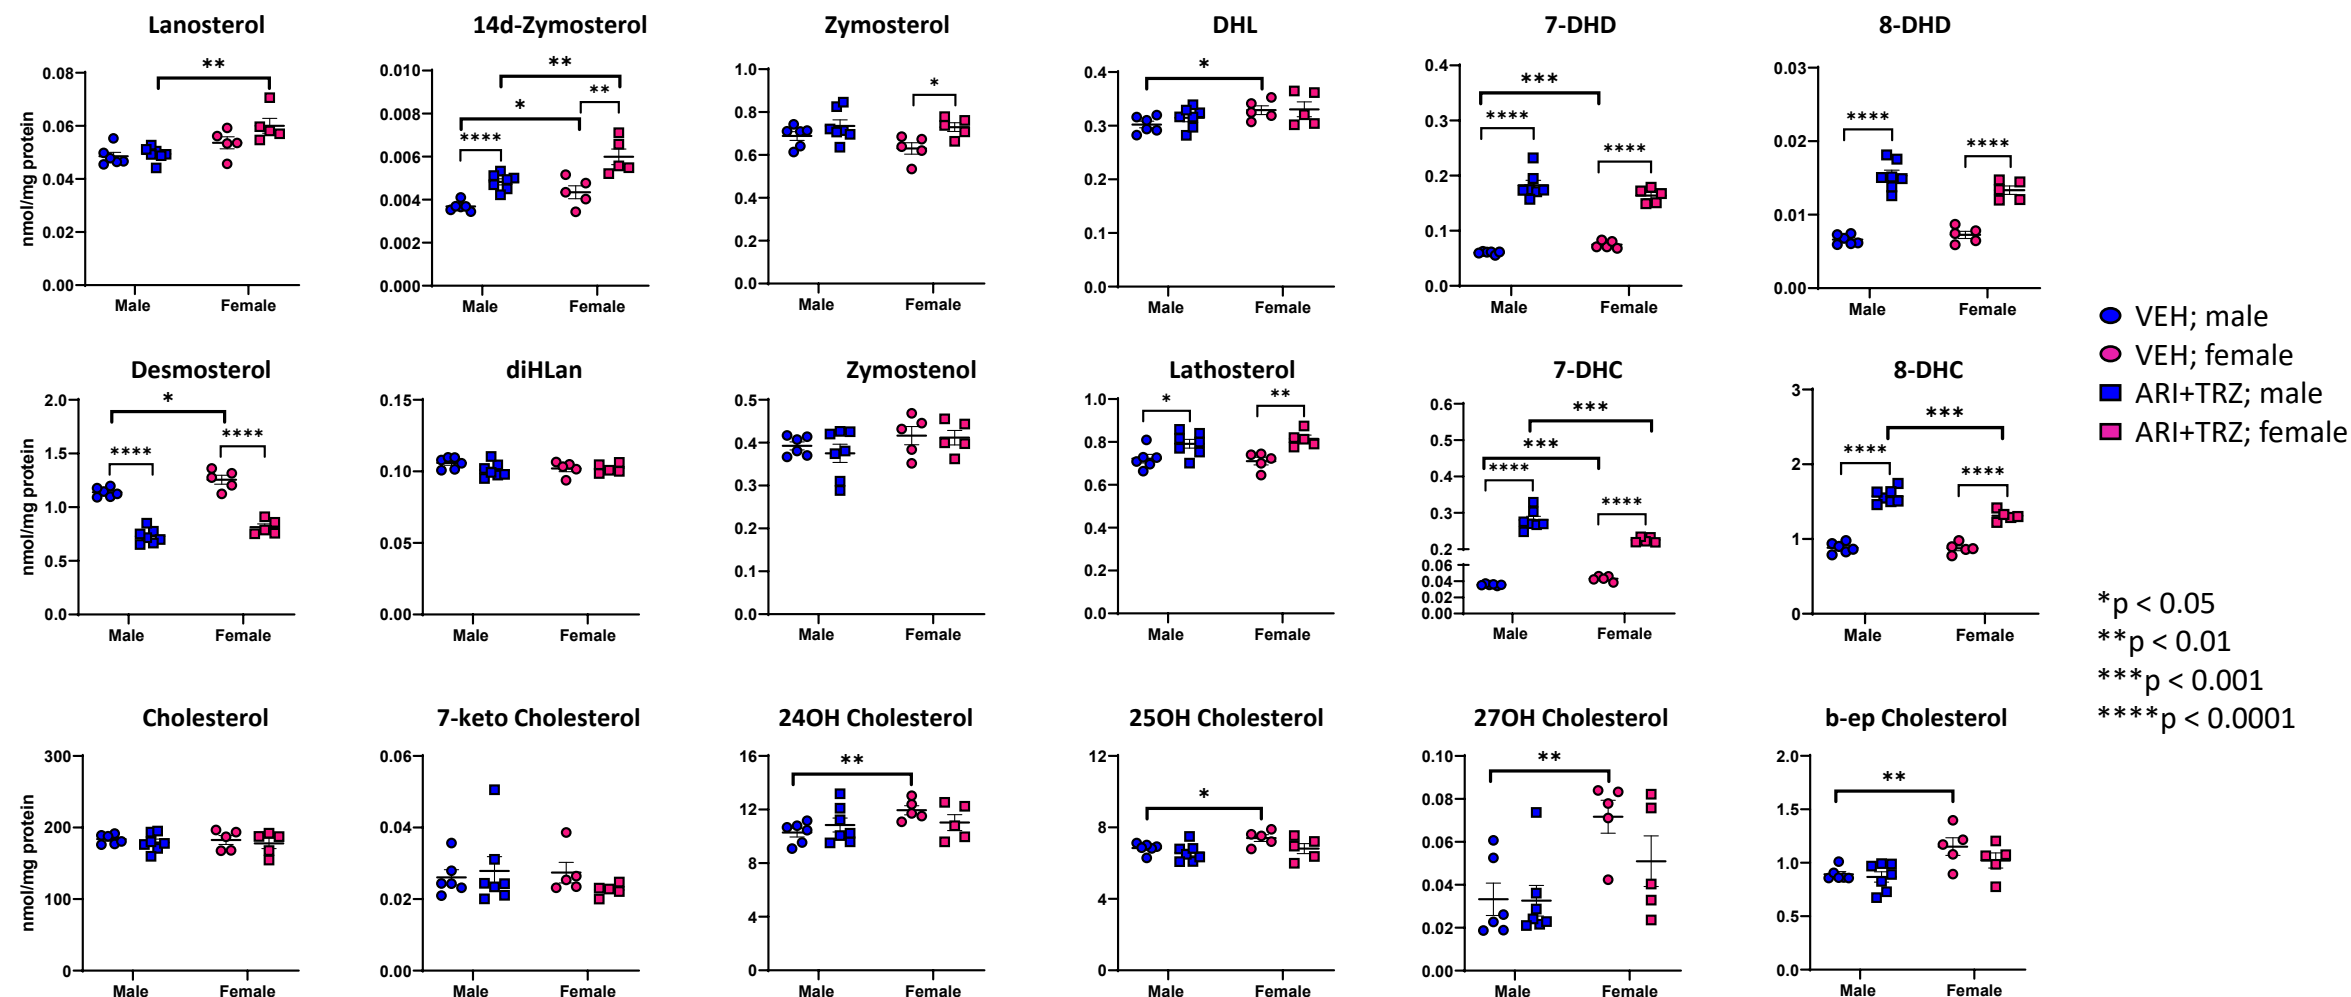

**Figure S8. Comparison of sterols and oxysterols between males and females within cortex.** Graphs show levels of sterols and oxysterols in males (blue) and females (red) under control (circles) and experimental (squares) conditions. Two-tailed unpaired t-tests were used to determine significance.

## Figure S9. Hippocampus

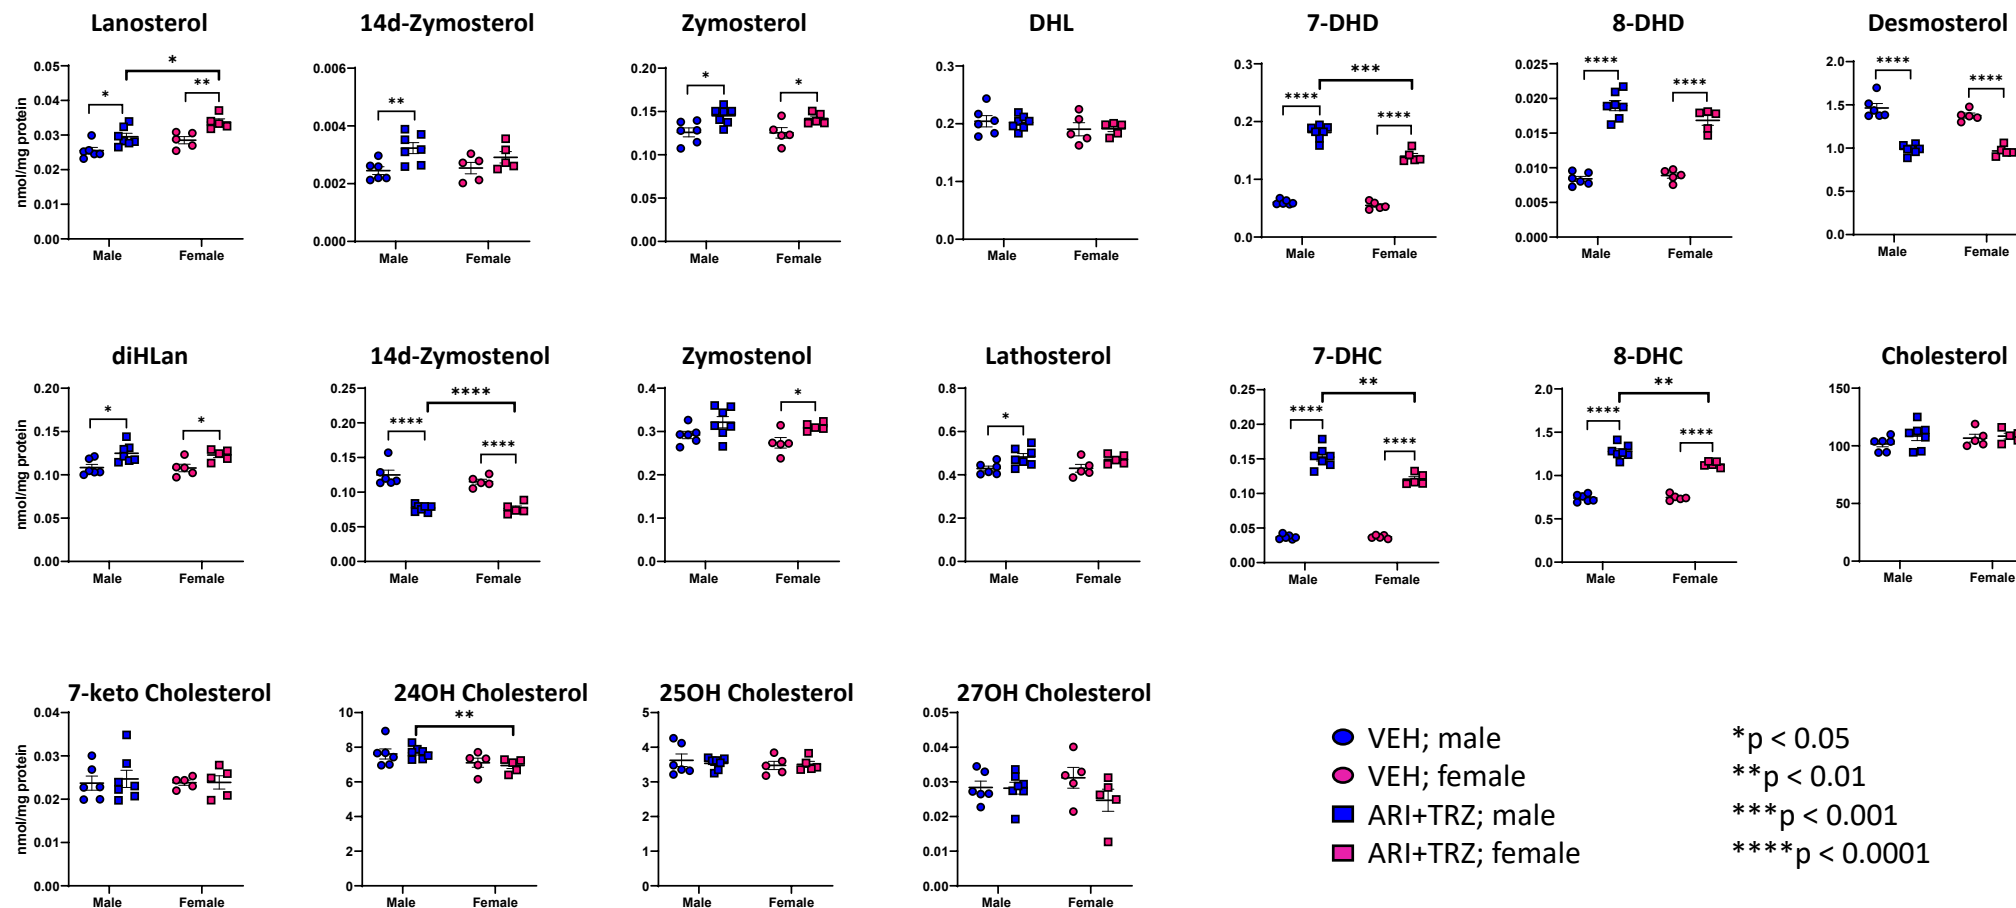

**Figure S9. Comparison of sterols and oxysterols between males and females within hippocampus.** Graphs show levels of sterols and oxysterols in males (blue) and females (red) under control (circles) and experimental (squares) conditions. Two-tailed unpaired t-tests were used to determine significance.

Figure S10.  
Hippocampus

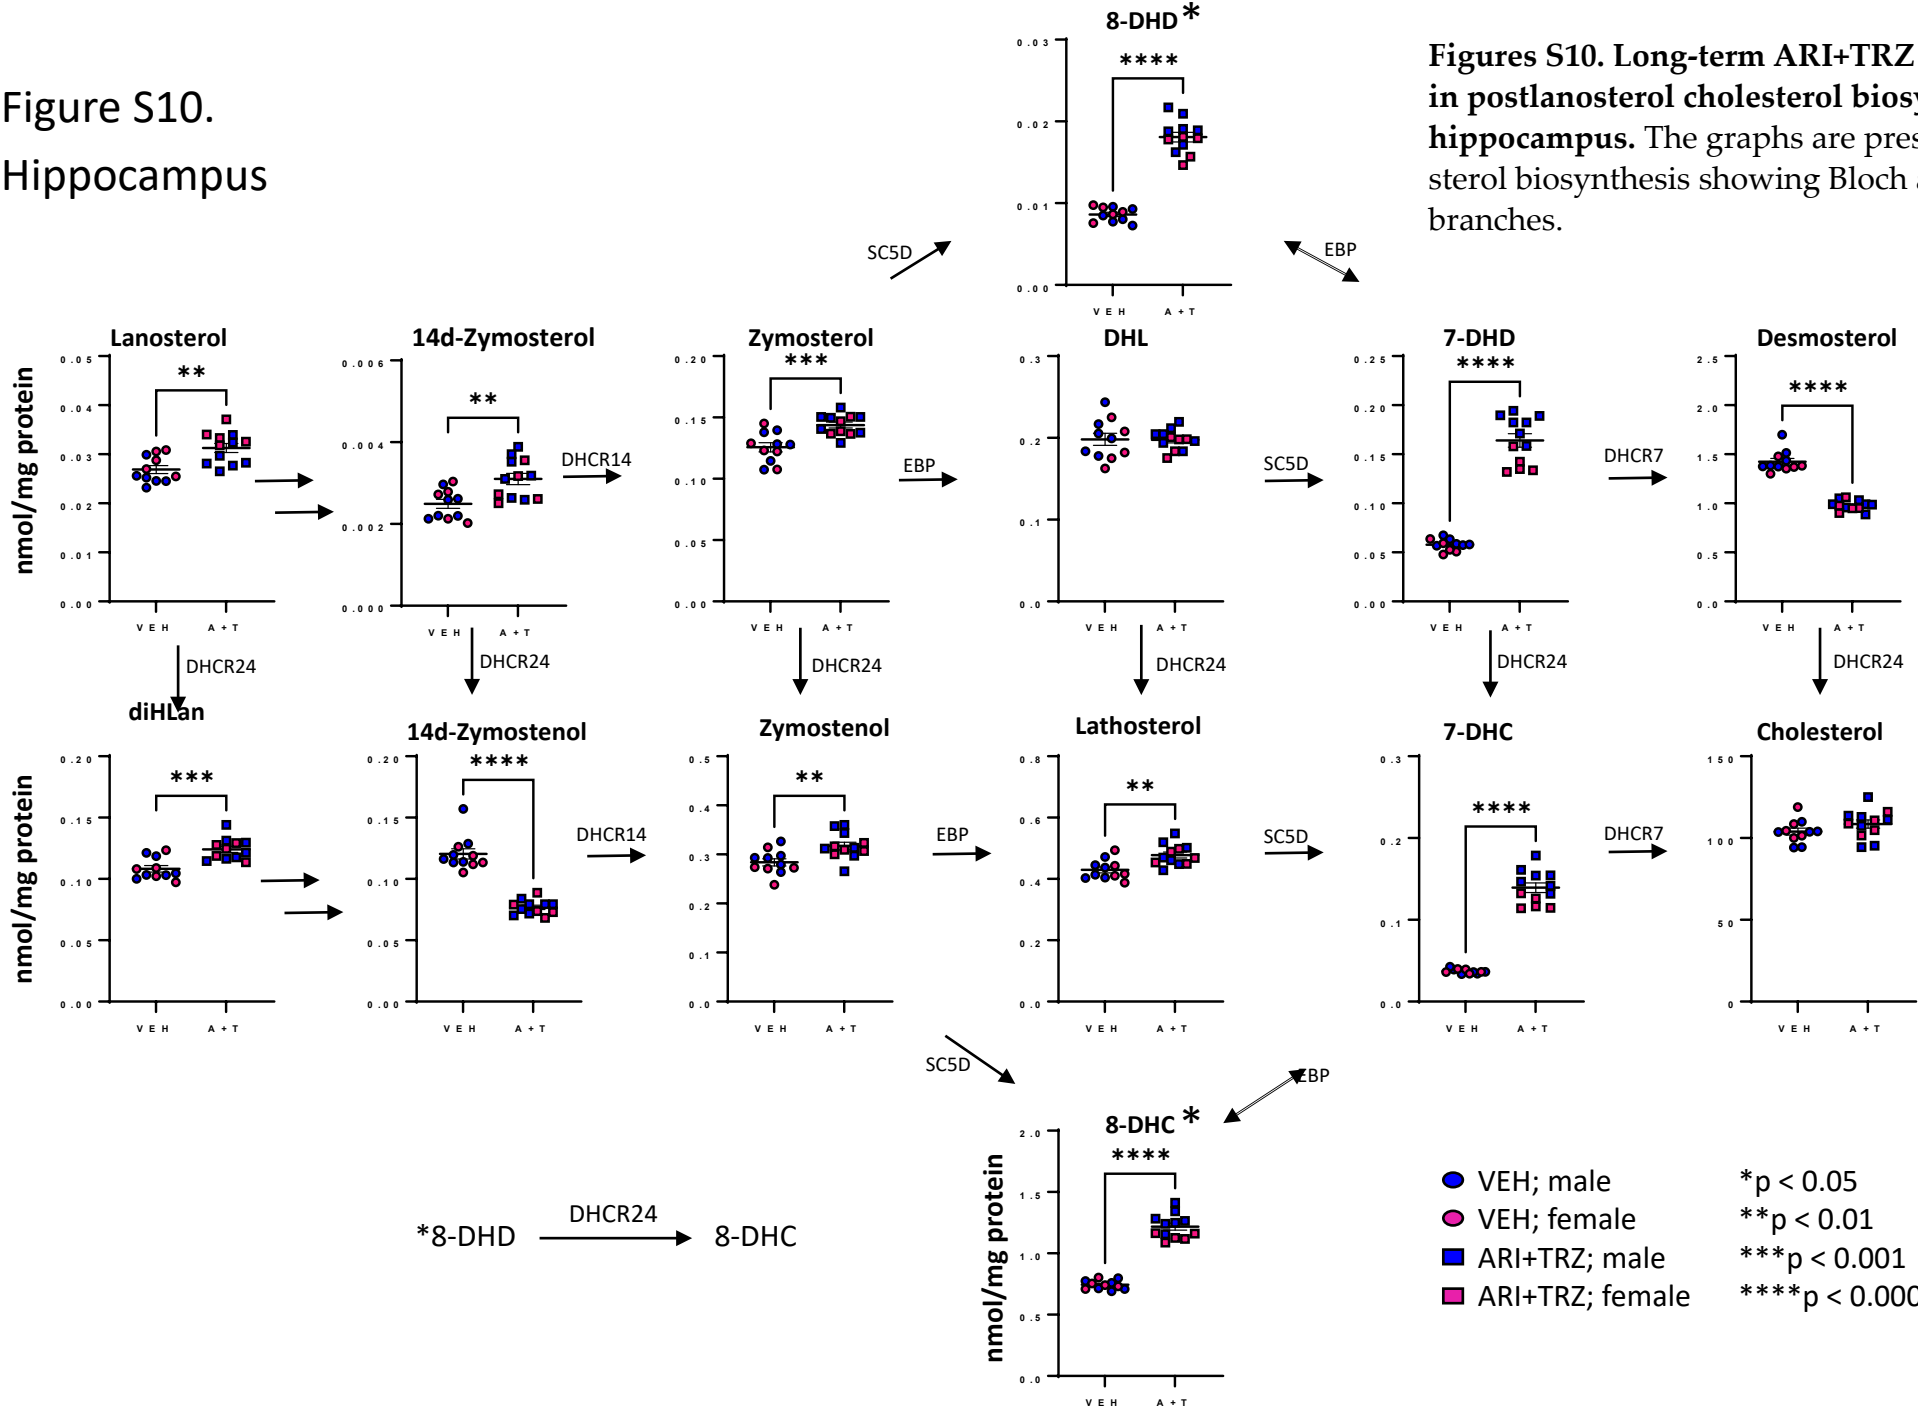

Figures S10. Long-term ARI+TRZ inhibits multiple enzymes in postlanosterol cholesterol biosynthesis pathway within hippocampus. The graphs are presented to coincide with the sterol biosynthesis showing Bloch and Kandutsch-Russell branches.

Table S4.

| TABLE S4.                                                   |                       | SERUM              |           |        |           |        | SPLEEN                 |         |        |           |        | LIVER                  |        |         |           |        | CORTEX                 |          |        |           |        | HIPPOCAMPUS            |          |        |           |         |                        |      |
|-------------------------------------------------------------|-----------------------|--------------------|-----------|--------|-----------|--------|------------------------|---------|--------|-----------|--------|------------------------|--------|---------|-----------|--------|------------------------|----------|--------|-----------|--------|------------------------|----------|--------|-----------|---------|------------------------|------|
|                                                             | DMG Sterols           | Abbr.              | VEH       |        | ARI + TRZ |        | t-test                 | VEH     |        | ARI + TRZ |        | t-test                 | VEH    |         | ARI + TRZ |        | t-test                 | VEH      |        | ARI + TRZ |        | t-test                 | VEH      |        | ARI + TRZ |         | t-test                 |      |
|                                                             |                       |                    | mean      | SEM    | mean      | SEM    |                        | p value | mean   | SEM       | mean   |                        | SEM    | p value | mean      | SEM    |                        | mean     | SEM    | p value   | mean   |                        | SEM      | mean   | SEM       | p value |                        | mean |
| Bloch                                                       | Lanosterol            | LAN                | 0.3149    | 0.0269 | 0.4425    | 0.0348 | <b>0.0092</b> **       | 0.0056  | 0.0002 | 0.0052    | 0.0002 | 0.1866                 | 0.0064 | 0.0004  | 0.0074    | 0.0003 | <b>0.0452</b> *        | 0.0509   | 0.0015 | 0.0538    | 0.0020 | 0.2514                 | 0.0269   | 0.0008 | 0.0313    | 0.0009  | <b>0.0019</b> **       |      |
|                                                             | 14-dehydrozymosterol  | 14-DZYM            | 0.0119    | 0.0005 | 0.0148    | 0.0006 | <b>0.0014</b> **       | 0.0003  | 0.0000 | 0.0003    | 0.0000 | 0.2203                 | 0.0003 | 0.0000  | 0.0004    | 0.0000 | <b>0.0028</b> **       | 0.0040   | 0.0002 | 0.0053    | 0.0002 | <b>0.0002</b> ***      | 0.0002   | 0.0001 | 0.0031    | 0.0001  | <b>0.0029</b> **       |      |
|                                                             | Zymosterol            | ZYM                | 0.0200    | 0.0018 | 0.0515    | 0.0041 | <b>&lt;0.0001</b> **** | 0.0015  | 0.0002 | 0.0019    | 0.0002 | 0.1973                 | 0.0011 | 0.0001  | 0.0022    | 0.0002 | <b>&lt;0.0001</b> **** | 0.6622   | 0.0180 | 0.7330    | 0.0178 | <b>0.0109</b> *        | 0.1257   | 0.0037 | 0.1438    | 0.0024  | <b>0.0005</b> ****     |      |
|                                                             | 24-dehydrolathosterol | DHL                | 0.0493    | 0.0035 | 0.1177    | 0.0085 | <b>&lt;0.0001</b> **** | 0.0067  | 0.0004 | 0.0080    | 0.0007 | 0.1175                 | 0.0024 | 0.0001  | 0.0044    | 0.0003 | <b>&lt;0.0001</b> **** | 0.3145   | 0.0063 | 0.3215    | 0.0072 | 0.4746                 | 0.1981   | 0.0074 | 0.1976    | 0.0036  | 0.9456                 |      |
|                                                             | 8-dehydrodesmosterol  | 8-DHD              | 0.0164    | 0.0011 | 0.0227    | 0.0016 | <b>0.0047</b> **       | 0.0011  | 0.0001 | 0.0017    | 0.0001 | <b>&lt;0.0000</b> **** | 0.0004 | 0.0000  | 0.0006    | 0.0000 | <b>0.0063</b> **       | 0.0069   | 0.0003 | 0.0145    | 0.0006 | <b>&lt;0.0001</b> **** | 0.0086   | 0.0003 | 0.0181    | 0.0006  | <b>&lt;0.0001</b> **** |      |
|                                                             | 7-dehydrodesmosterol  | 7-DHD              | 0.0750    | 0.0047 | 0.2200    | 0.0171 | <b>&lt;0.0001</b> **** | 0.0053  | 0.0003 | 0.0174    | 0.0012 | <b>&lt;0.0001</b> **** | 0.0030 | 0.0001  | 0.0071    | 0.0005 | <b>&lt;0.0001</b> **** | 0.0668   | 0.0027 | 0.1746    | 0.0064 | <b>&lt;0.0001</b> **** | 0.0578   | 0.0018 | 0.1641    | 0.0069  | <b>&lt;0.0001</b> **** |      |
| Kandutsch<br>Russell                                        | Desmosterol           | DES                | 0.4025    | 0.0447 | 0.2172    | 0.0223 | <b>0.0010</b> **       | 0.0311  | 0.0015 | 0.0128    | 0.0011 | <b>&lt;0.0001</b> **** | 0.0124 | 0.0009  | 0.0055    | 0.0003 | <b>&lt;0.0001</b> **** | 1.1920   | 0.0272 | 0.7646    | 0.0227 | <b>&lt;0.0001</b> **** | 1.4240   | 0.0327 | 0.9781    | 0.0155  | <b>&lt;0.0001</b> **** |      |
|                                                             | dihydrolanosterol     | DIHLAN             | 0.7923    | 0.0051 | 0.8021    | 0.0046 | 0.1661                 | 0.0199  | 0.0002 | 0.0197    | 0.0002 | 0.4357                 | 0.0179 | 0.0001  | 0.0182    | 0.0001 | <b>0.0389</b> *        | 0.1041   | 0.0014 | 0.1014    | 0.0013 | 0.1654                 | 0.1082   | 0.0027 | 0.1241    | 0.0025  | <b>0.0003</b> ****     |      |
|                                                             | 14-dehydrozymostenol  | 14-DZYME           | 0.0544    | 0.0054 | 0.0290    | 0.0029 | <b>0.0004</b> ***      | 0.0041  | 0.0001 | 0.0018    | 0.0001 | <b>&lt;0.0001</b> **** | 0.0017 | 0.0001  | 0.0009    | 0.0000 | <b>&lt;0.0001</b> **** |          |        |           |        |                        | 0.1204   | 0.0042 | 0.0769    | 0.0002  | <b>&lt;0.0001</b> **** |      |
|                                                             | Zymostenol            | ZYME               | 0.03964   | 0.0042 | 0.1330    | 0.0100 | <b>&lt;0.0001</b> **** | 0.0015  | 0.0001 | 0.0023    | 0.0002 | <b>0.0020</b> **       | 0.0013 | 0.0001  | 0.0033    | 0.0003 | <b>&lt;0.0001</b> **** | 0.4034   | 0.0109 | 0.3904    | 0.0147 | 0.4903                 | 0.2838   | 0.0074 | 0.3171    | 0.0077  | <b>0.0052</b> **       |      |
|                                                             | Lathosterol           | LATH               | 0.2244    | 0.0180 | 0.5073    | 0.0405 | <b>&lt;0.0001</b> **** | 0.0093  | 0.0005 | 0.0118    | 0.0009 | <b>0.0337</b> *        | 0.0050 | 0.0003  | 0.0099    | 0.0009 | <b>&lt;0.0001</b> **** | 0.7172   | 0.0132 | 0.8012    | 0.0138 | <b>0.0003</b> ***      | 0.4296   | 0.0096 | 0.4780    | 0.0099  | <b>0.0022</b> **       |      |
|                                                             | 7-dehydrocholesterol  | 7-DHC              | 0.2550    | 0.0216 | 7.8250    | 0.5568 | <b>&lt;0.0001</b> **** | 0.0086  | 0.0008 | 0.0834    | 0.0073 | <b>&lt;0.0001</b> **** | 0.0066 | 0.0002  | 0.1614    | 0.0140 | <b>&lt;0.0001</b> **** | 0.0390   | 0.0014 | 0.2576    | 0.0101 | <b>&lt;0.0001</b> **** | 0.0371   | 0.0008 | 0.1393    | 0.0059  | <b>&lt;0.0001</b> **** |      |
| Oxysterols                                                  | 8-dehydrocholesterol  | 8-DHC              | 0.9467    | 0.0768 | 3.6740    | 0.2192 | <b>&lt;0.0001</b> **** | 0.0382  | 0.0040 | 0.0748    | 0.0067 | <b>0.0002</b> ***      | 0.0250 | 0.0010  | 0.0678    | 0.0041 | <b>&lt;0.0001</b> **** | 0.8802   | 0.0204 | 1.4650    | 0.0461 | <b>&lt;0.0001</b> **** | 0.7439   | 0.0116 | 1.2170    | 0.0284  | <b>&lt;0.0001</b> **** |      |
|                                                             | Cholesterol           | CHOL               | 292.0000  | 7.1940 | 275.2000  | 5.7090 | 0.0790                 | 10.9600 | 0.5030 | 9.4480    | 0.3723 | <b>0.0231</b> *        | 8.5990 | 0.3961  | 7.9970    | 0.3965 | 0.2964                 | 183.2000 | 3.0090 | 178.6000  | 3.8490 | 0.3616                 | 104.0000 | 2.1100 | 108.5000  | 2.5010  | 0.1800                 |      |
|                                                             | 7-keto cholesterol    | 7-KETO             | 0.2177    | 0.0149 | 0.2560    | 0.0183 | 0.1228                 | 0.0123  | 0.0009 | 0.0093    | 0.0005 | <b>0.0073</b> **       | 0.0041 | 0.0003  | 0.0057    | 0.0006 | <b>0.0387</b> *        | 0.0267   | 0.0017 | 0.0257    | 0.0024 | 0.7336                 | 0.0238   | 0.0009 | 0.0244    | 0.0013  | 0.7163                 |      |
|                                                             | 24OH-cholesterol      | 24OH-CHOL          |           |        |           |        |                        |         |        |           |        |                        |        |         |           |        |                        | 11.0400  | 0.3447 | 10.9200   | 0.3755 | 0.8174                 | 7.3830   | 0.2066 | 7.3750    | 0.1477  | 0.9747                 |      |
|                                                             | 25OH-cholesterol      | 25OH-CHOL          | 0.1343    | 0.0131 | 0.1379    | 0.0086 | 0.8173                 | 0.0058  | 0.0004 | 0.0050    | 0.0003 | 0.1329                 | 0.0068 | 0.0004  | 0.0054    | 0.0003 | <b>0.0042</b> **       | 7.0980   | 0.1348 | 6.6850    | 0.1566 | 0.0609                 | 3.5570   | 0.1101 | 3.5240    | 0.0496  | 0.7817                 |      |
|                                                             | 27OH-cholesterol      | 27OH-CHOL          | 0.1733    | 0.0135 | 0.1818    | 0.0185 | 0.7146                 | 0.0034  | 0.0002 | 0.0032    | 0.0002 | 0.5372                 | 0.0074 | 0.0005  | 0.0053    | 0.0003 | <b>0.0011</b> **       | 0.0508   | 0.0079 | 0.0403    | 0.0067 | 0.3206                 | 0.0297   | 0.0017 | 0.0267    | 0.0017  | 0.2238                 |      |
|                                                             |                       | β-epoxycholesterol | β-EP CHOL | 4.6600 | 0.2818    | 4.7910 | 0.2879                 | 0.7495  | 0.1708 | 0.0147    | 0.1579 | 0.0139                 | 0.5277 | 0.1180  | 0.0063    | 0.1236 | 0.0058                 | 0.5162   | 1.0100 | 0.0555    | 0.9317 | 0.0451                 | 0.2821   |        |           |         |                        |      |
| these numbers are males and females combined (NOT SEPARATE) |                       |                    |           |        |           |        |                        |         |        |           |        |                        |        |         |           |        |                        |          |        |           |        |                        |          |        |           |         |                        |      |

Table S4. Sterols and oxysterol levels (Mean±SEM) in serum, and organs in VEH and ARI+TRZ exposed mice.

Table S5.

| SERUM                |                       |           |          |        |          |           |                   |          |           |          |        |               |
|----------------------|-----------------------|-----------|----------|--------|----------|-----------|-------------------|----------|-----------|----------|--------|---------------|
| VEH                  |                       |           | VEH      |        |          | ARI + TRZ |                   |          | ARI + TRZ |          |        |               |
| SEX                  |                       |           | SEX      |        |          | SEX       |                   |          | SEX       |          |        |               |
| Male                 |                       |           | Female   |        |          | VEH       |                   |          | Male      |          |        | A+T           |
| mean                 |                       |           | SEM      |        |          | p value   |                   |          | mean      |          |        | p value       |
| Bloch                | DMG Sterols           | Abbr.     | mean     | SEM    | mean     | SEM       | p value           |          | mean      | SEM      | SEM    |               |
|                      | Lanosterol            | LAN       | 0.2645   | 0.0254 | 0.3753   | 0.0364    | <b>0.0306</b>     |          | 0.3721    | 0.0176   | 0.5412 | 0.0562        |
|                      | 14-dehydrozymosterol  | 14-DZYM   | 0.0120   | 0.0007 | 0.0118   | 0.0008    | 0.8825            | 0.0155   | 0.0009    | 0.0137   | 0.0006 | 0.1567        |
|                      | Zymosterol            | ZYM       | 0.0203   | 0.0017 | 0.0196   | 0.0036    | 0.8555            | 0.0447   | 0.0048    | 0.0610   | 0.0051 | <b>0.0469</b> |
|                      | 24-dehydrolathosterol | DHL       | 0.0474   | 0.0047 | 0.0516   | 0.0058    | 0.5776            | 0.0991   | 0.0073    | 0.1436   | 0.0085 | <b>0.0027</b> |
|                      | 8-dehydrosdesmosterol | 8-DHD     | 0.0165   | 0.0016 | 0.0163   | 0.0016    | 0.9160            | 0.0207   | 0.0015    | 0.0255   | 0.0031 | 0.1550        |
|                      | 7-dehydrosdesmosterol | 7-DHD     | 0.0647   | 0.0024 | 0.0874   | 0.0066    | <b>0.0068</b>     | 0.1898   | 0.0100    | 0.2622   | 0.0309 | <b>0.0284</b> |
|                      | Desmosterol           | DES       | 0.4619   | 0.0727 | 0.3312   | 0.0272    | 0.1544            | 0.1977   | 0.0171    | 0.2447   | 0.0485 | 0.3220        |
| Kandutsch<br>Russell | dihydrolanosterol     | DIHLAN    | 0.7880   | 0.0057 | 0.7972   | 0.0092    | 0.4045            | 0.7928   | 0.0048    | 0.8152   | 0.0041 | <b>0.0073</b> |
|                      | 14-dehydrozymosterol  | 14-DZYME  | 0.0604   | 0.0092 | 0.0473   | 0.0034    | 0.2463            | 0.0272   | 0.0024    | 0.0315   | 0.0064 | 0.4973        |
|                      | Zymosterol            | ZYME      | 0.0395   | 0.0029 | 0.0398   | 0.0092    | 0.9793            | 0.1217   | 0.0108    | 0.1489   | 0.0174 | 0.1913        |
|                      | Lathosterol           | LATH      | 0.2097   | 0.0161 | 0.2420   | 0.0354    | 0.4013            | 0.4439   | 0.0325    | 0.5962   | 0.0723 | 0.0588        |
|                      | 7-dehydrocholesterol  | 7-DHC     | 0.1940   | 0.0040 | 0.3281   | 0.0098    | <b>&lt;0.0001</b> | 6.9694   | 0.5152    | 9.0219   | 0.9349 | 0.6510        |
|                      | 8-dehydrocholesterol  | 8-DHC     | 0.7491   | 0.0173 | 1.1838   | 0.0787    | <b>0.0002</b>     | 3.2080   | 0.1825    | 4.3260   | 0.2547 | <b>0.0043</b> |
|                      | Cholesterol           | CHOL      | 281.4323 | 8.5194 | 304.6943 | 10.0970   | 0.1097            | 276.1044 | 9.1612    | 273.9122 | 6.1786 | 0.8601        |
|                      | 7-keto cholesterol    | 7-KETO    | 0.2200   | 0.0260 | 0.2149   | 0.0142    | 0.8735            | 0.2710   | 0.0268    | 0.2349   | 0.0224 | 0.3541        |
| Oxysterols           | 24OH-cholesterol      | 24OH-CHOL |          |        |          |           |                   |          |           |          |        |               |
|                      | 25OH-cholesterol      | 25OH-CHOL | 0.1078   | 0.0068 | 0.1660   | 0.0203    | <b>0.0165</b>     | 0.1249   | 0.0105    | 0.1560   | 0.0104 | 0.0699        |
|                      | 27OH-cholesterol      | 27OH-CHOL | 0.1793   | 0.0169 | 0.1661   | 0.0235    | 0.6510            | 0.2024   | 0.0323    | 0.1572   | 0.0059 | 0.2425        |
|                      | β-epoxycholesterol    | β-EP CHOL | 4.1464   | 0.3352 | 5.2763   | 0.3066    | <b>0.0372</b>     | 4.1819   | 0.2798    | 5.6430   | 0.2668 | <b>0.0046</b> |

| SPLEEN  |        |         |        |                   |        |           |         |        |                   |  |  |         |
|---------|--------|---------|--------|-------------------|--------|-----------|---------|--------|-------------------|--|--|---------|
| VEH     |        |         | VEH    |                   |        | ARI + TRZ |         |        | ARI + TRZ         |  |  |         |
| SEX     |        |         | SEX    |                   |        | SEX       |         |        | SEX               |  |  |         |
| Male    |        |         | Female |                   |        | VEH       |         |        | Male              |  |  | A+T     |
| mean    |        |         | SEM    |                   |        | p value   |         |        | mean              |  |  | p value |
| 0.0051  | 0.0003 | 0.0061  | 0.0001 | <b>0.0382</b>     | 0.0047 | 0.0002    | 0.0057  | 0.0003 | <b>0.0079</b>     |  |  |         |
| 0.0003  | 0.0000 | 0.0003  | 0.0000 | <b>0.0232</b>     | 0.0003 | 0.0000    | 0.0004  | 0.0000 | 0.0966            |  |  |         |
| 0.0010  | 0.0001 | 0.0020  | 0.0002 | <b>0.0003</b>     | 0.0015 | 0.0002    | 0.0024  | 0.0004 | <b>0.0459</b>     |  |  |         |
| 0.0058  | 0.0003 | 0.0078  | 0.0005 | <b>0.0044</b>     | 0.0067 | 0.0007    | 0.0098  | 0.0008 | <b>0.0124</b>     |  |  |         |
| 0.0009  | 0.0000 | 0.0013  | 0.0001 | <b>0.0005</b>     | 0.0017 | 0.0001    | 0.0019  | 0.0001 | 0.2958            |  |  |         |
| 0.0046  | 0.0002 | 0.0062  | 0.0004 | <b>0.0048</b>     | 0.0155 | 0.0012    | 0.0201  | 0.0017 | <b>0.0464</b>     |  |  |         |
| 0.0287  | 0.0013 | 0.0340  | 0.0024 | 0.0732            | 0.0103 | 0.0006    | 0.0164  | 0.0015 | <b>0.0019</b>     |  |  |         |
| 0.0195  | 0.0001 | 0.0203  | 0.0002 | <b>0.0045</b>     | 0.0193 | 0.0001    | 0.0202  | 0.0001 | <b>0.0007</b>     |  |  |         |
| 0.0039  | 0.0001 | 0.0042  | 0.0002 | 0.3260            | 0.0015 | 0.0001    | 0.0021  | 0.0002 | <b>0.0110</b>     |  |  |         |
| 0.0012  | 0.0001 | 0.0019  | 0.0001 | <b>&lt;0.0001</b> | 0.0020 | 0.0002    | 0.0027  | 0.0003 | <b>0.0486</b>     |  |  |         |
| 0.0062  | 0.0005 | 0.0105  | 0.0006 | <b>0.0171</b>     | 0.0098 | 0.0010    | 0.0146  | 0.0007 | <b>0.0039</b>     |  |  |         |
| 0.0068  | 0.0002 | 0.0107  | 0.0011 | <b>0.0054</b>     | 0.0704 | 0.0090    | 0.1015  | 0.0064 | <b>0.0278</b>     |  |  |         |
| 0.0290  | 0.0021 | 0.0492  | 0.0052 | <b>0.0038</b>     | 0.0599 | 0.0045    | 0.0956  | 0.0081 | <b>0.0020</b>     |  |  |         |
| 10.0537 | 0.4909 | 12.0562 | 0.6952 | <b>0.0039</b>     | 8.6837 | 0.4030    | 10.5178 | 0.2883 | <b>0.0068</b>     |  |  |         |
| 0.0119  | 0.0015 | 0.0127  | 0.0010 | 0.7016            | 0.0091 | 0.0005    | 0.0094  | 0.0010 | 0.7875            |  |  |         |
| 0.0052  | 0.0003 | 0.0065  | 0.0006 | 0.0911            | 0.0043 | 0.0003    | 0.0060  | 0.0002 | <b>0.0005</b>     |  |  |         |
| 0.0034  | 0.0003 | 0.0033  | 0.0004 | 0.7681            | 0.0028 | 0.0001    | 0.0037  | 0.0002 | <b>0.0026</b>     |  |  |         |
| 0.1406  | 0.0155 | 0.2071  | 0.0149 | <b>0.0137</b>     | 0.1231 | 0.0072    | 0.2066  | 0.0119 | <b>&lt;0.0001</b> |  |  |         |

| LIVER  |        |        |        |               |               |               |               |               |               |  |  |         |
|--------|--------|--------|--------|---------------|---------------|---------------|---------------|---------------|---------------|--|--|---------|
| VEH    |        |        | VEH    |               |               | ARI + TRZ     |               |               | ARI + TRZ     |  |  |         |
| SEX    |        |        | SEX    |               |               | SEX           |               |               | SEX           |  |  |         |
| Male   |        |        | Female |               |               | VEH           |               |               | Male          |  |  | A+T     |
| mean   |        |        | SEM    |               |               | p value       |               |               | mean          |  |  | p value |
| 0.0068 | 0.0005 | 0.0058 | 0.0005 | 0.1943        | 0.0075        | 0.0005        | 0.0073        | 0.0004        | 0.8159        |  |  |         |
| 0.0003 | 0.0000 | 0.0003 | 0.0000 | 0.3224        | 0.0004        | 0.0000        | 0.0003        | 0.0000        | <b>0.0036</b> |  |  |         |
| 0.0012 | 0.0001 | 0.0011 | 0.0001 | 0.7265        | 0.0023        | 0.0002        | 0.0021        | 0.0003        | 0.5810        |  |  |         |
| 0.0026 | 0.0002 | 0.0023 | 0.0002 | 0.2657        | 0.0044        | 0.0004        | 0.0044        | 0.0004        | 0.9694        |  |  |         |
| 0.0005 | 0.0000 | 0.0004 | 0.0000 | 0.2213        | <b>0.0006</b> | <b>0.0000</b> | <b>0.0005</b> | <b>0.0001</b> | 0.3208        |  |  |         |
| 0.0030 | 0.0002 | 0.0030 | 0.0002 | 0.8432        | 0.0068        | 0.0007        | 0.0075        | 0.0007        | 0.5126        |  |  |         |
| 0.0146 | 0.0008 | 0.0098 | 0.0002 | <b>0.0007</b> | 0.0059        | 0.0003        | 0.0050        | 0.0007        | 0.2239        |  |  |         |
| 0.0181 | 0.0002 | 0.0177 | 0.0001 | 0.0793        | <b>0.0183</b> | <b>0.0001</b> | <b>0.0180</b> | <b>0.0001</b> | <b>0.0036</b> |  |  |         |
| 0.0021 | 0.0001 | 0.0013 | 0.0000 | <b>0.0009</b> | 0.0009        | 0.0001        | 0.0008        | 0.0001        | 0.1174        |  |  |         |
| 0.0014 | 0.0001 | 0.0012 | 0.0001 | 0.3201        | 0.0034        | 0.0005        | 0.0032        | 0.0006        | 0.8175        |  |  |         |
| 0.0057 | 0.0004 | 0.0042 | 0.0003 | <b>0.0185</b> | 0.0098        | 0.0008        | 0.0099        | 0.0019        | 0.9784        |  |  |         |
| 0.0065 | 0.0002 | 0.0067 | 0.0004 | 0.6749        | 0.1601        | 0.0195        | 0.1631        | 0.0220        | 0.9229        |  |  |         |
| 0.0243 | 0.0010 | 0.0258 | 0.0020 | 0.4868        | 0.0666        | 0.0051        | 0.0695        | 0.0073        | 0.7446        |  |  |         |
| 9.6096 | 0.3305 | 7.3852 | 0.1565 | <b>0.0003</b> | 8.9033        | 0.3001        | 6.7287        | 0.3982        | <b>0.0012</b> |  |  |         |
| 0.0047 | 0.0004 | 0.0034 | 0.0003 | <b>0.0344</b> | 0.0069        | 0.0007        | 0.0040        | 0.0005        | <b>0.0128</b> |  |  |         |
| 0.0069 | 0.0006 | 0.0068 | 0.0005 | 0.9531        | 0.0052        | 0.0004        | 0.0057        | 0.0003        | 0.3184        |  |  |         |
| 0.0086 | 0.0003 | 0.0059 | 0.0002 | <b>0.0002</b> | 0.0058        | 0.0002        | 0.0046        | 0.0004        | <b>0.0119</b> |  |  |         |
| 0.1246 | 0.0106 | 0.1100 | 0.0045 | 0.2722        | 0.1224        | 0.0069        | 0.1253        | 0.0108        | 0.8159        |  |  |         |

|                      |                       |           | CORTEX   |        |          |        |               |           |        |           |        |               |
|----------------------|-----------------------|-----------|----------|--------|----------|--------|---------------|-----------|--------|-----------|--------|---------------|
|                      |                       |           | VEH      |        | VEH      |        |               | ARI + TRZ |        | ARI + TRZ |        |               |
|                      |                       |           | SEX      |        | SEX      |        |               | SEX       |        | SEX       |        |               |
|                      |                       |           | Male     |        | Female   |        | VEH           | Male      |        | Female    |        | A+T           |
|                      | DMG Sterols           | Abbr.     | mean     | SEM    | mean     | SEM    | p value       | mean      | SEM    | mean      | SEM    | p value       |
| Bloch                | Lanosterol            | LAN       | 0.0486   | 0.0015 | 0.0536   | 0.0022 | 0.0846        | 0.0494    | 0.0010 | 0.0600    | 0.0028 | <b>0.0022</b> |
|                      | 14-dehydrozymosterol  | 14-DZYM   | 0.0037   | 0.0001 | 0.0043   | 0.0003 | <b>0.0476</b> | 0.0048    | 0.0001 | 0.0060    | 0.0004 | <b>0.0073</b> |
|                      | Zymosterol            | ZYM       | 0.6886   | 0.0203 | 0.6307   | 0.0267 | 0.1125        | 0.7353    | 0.0281 | 0.7299    | 0.0203 | 0.8885        |
|                      | 24-dehydrolathosterol | DHL       | 0.0070   | 0.0003 | 0.0070   | 0.0005 | <b>0.0256</b> | 0.0150    | 0.0007 | 0.0130    | 0.0006 | 0.3000        |
|                      | 8-dehydrosdesmosterol | 8-DHD     | 0.0066   | 0.0003 | 0.0073   | 0.0005 | 0.2560        | 0.0153    | 0.0007 | 0.0133    | 0.0006 | 0.0783        |
|                      | 7-dehydrosdesmosterol | 7-DHD     | 0.0603   | 0.0010 | 0.0747   | 0.0030 | <b>0.0008</b> | 0.1824    | 0.0093 | 0.1637    | 0.0059 | 0.1548        |
|                      | Desmosterol           | DES       | 1.1392   | 0.0174 | 1.2561   | 0.0420 | <b>0.0223</b> | 0.7297    | 0.0259 | 0.8135    | 0.0310 | 0.0641        |
|                      | dihydrolanosterol     | DIHLAN    | 0.3023   | 0.0062 | 0.3291   | 0.0081 | 0.1866        | 0.3149    | 0.0074 | 0.3307    | 0.0137 | 0.6843        |
| Kandutsch<br>Russell | 14-dehydrozymostenol  | 14-DZYME  |          |        |          |        |               |           |        |           |        |               |
|                      | Zymostenol            | ZYME      | 0.3926   | 0.0093 | 0.4164   | 0.0212 | 0.3015        | 0.3751    | 0.0212 | 0.4118    | 0.0169 |               |
|                      | Lathosterol           | LATH      | 0.7225   | 0.0200 | 0.7108   | 0.0182 | 0.6809        | 0.7914    | 0.0205 | 0.8148    | 0.0169 | 0.4281        |
|                      | 7-dehydrocholesterol  | 7-DHC     | 0.0356   | 0.0004 | 0.0431   | 0.0015 | <b>0.0004</b> | 0.2804    | 0.0103 | 0.2256    | 0.0033 | <b>0.0015</b> |
|                      | 8-dehydrocholesterol  | 8-DHC     | 0.8833   | 0.0288 | 0.8765   | 0.0323 | 0.8774        | 1.5750    | 0.0372 | 1.3115    | 0.0314 | <b>0.0005</b> |
|                      | Cholesterol           | CHOL      | 183.7624 | 2.7001 | 182.6276 | 6.2187 | 0.8623        | 179.1427  | 4.6799 | 177.9157  | 7.1826 | 0.8837        |
| Oxysterols           | 7-keto cholesterol    | 7-KETO    | 0.0261   | 0.0021 | 0.0274   | 0.0029 | 0.7118        | 0.0279    | 0.0040 | 0.0226    | 0.0008 | 0.3012        |
|                      | 24OH-cholesterol      | 24OH-CHOL | 10.2862  | 0.3264 | 11.9475  | 0.3425 | <b>0.0068</b> | 10.8461   | 0.5226 | 11.0270   | 0.5935 | 0.0741        |
|                      | 25OH-cholesterol      | 25OH-CHOL | 6.8419   | 0.1186 | 7.4049   | 0.1887 | <b>0.0278</b> | 6.5908    | 0.1886 | 6.8170    | 0.2822 | 0.5027        |
|                      | 27OH-cholesterol      | 27OH-CHOL | 0.0333   | 0.0075 | 0.0717   | 0.0077 | <b>0.0063</b> | 0.0326    | 0.0071 | 0.0510    | 0.0118 | 0.1868        |
|                      | β-epoxycholesterol    | β-EP CHOL | 0.8922   | 0.0248 | 1.1515   | 0.0827 | <b>0.0098</b> | 0.8677    | 0.0486 | 1.0214    | 0.0706 | 0.0924        |



Table S5.

| SERUM                |                       |           | p value<br>VEH vs ARI+TRZ |             | SPLEEN      |             |             | p value<br>VEH vs ARI+TRZ |  | LIVER       |             |             | p value<br>VEH vs ARI+TRZ |  | CORTEX      |             |             | p value<br>VEH vs ARI+TRZ |  | HIP         |             |             | p value<br>VEH vs ARI+TRZ |  |
|----------------------|-----------------------|-----------|---------------------------|-------------|-------------|-------------|-------------|---------------------------|--|-------------|-------------|-------------|---------------------------|--|-------------|-------------|-------------|---------------------------|--|-------------|-------------|-------------|---------------------------|--|
|                      | DMG Sterols           |           | Males                     | Females     | DMG Sterols | Males       | Females     |                           |  | DMG Sterols | Males       | Females     |                           |  | DMG Sterols | Males       | Females     |                           |  | DMG Sterols | Males       | Females     |                           |  |
|                      |                       |           |                           |             |             |             |             |                           |  |             |             |             |                           |  |             |             |             |                           |  |             |             |             |                           |  |
| Bloch                | Lanosterol            | LAN       | 0.0044**                  | 0.0383*     | LAN         | 0.2856      | 0.2478      |                           |  | LAN         | 0.3689      | 0.0443*     |                           |  | LAN         | 0.6450      | 0.1099      |                           |  | LAN         | 0.0156*     | 0.0054**    |                           |  |
|                      | 14-dehydrozymosterol  | 14-DZYM   | 0.0104*                   | 0.0756      | 14-DZYM     | 0.0313*     | 0.8996      |                           |  | 14-DZYM     | 0.0002***   | 0.7814      |                           |  | 14-DZYM     | <0.0001**** | 0.0081**    |                           |  | 14-DZYM     | 0.0078**    | 0.2151      |                           |  |
|                      | Zymosterol            | ZYM       | 0.0010**                  | 0.0002***   | ZYM         | 0.0979      | 0.3563      |                           |  | ZYM         | 0.0023**    | 0.0084**    |                           |  | ZYM         | 0.2187      | 0.0183      |                           |  | ZYM         | 0.0105*     | 0.039*      |                           |  |
|                      | 24-dehydrolathosterol | DHL       | 0.0001***                 | <0.0001**** | DHL         | 0.2457      | 0.0584      |                           |  | DHL         | 0.0038**    | 0.0012**    |                           |  | DHL         | 0.2237      | 0.9234      |                           |  | DHL         | 0.8234      | 0.9566      |                           |  |
|                      | 8-dehydrodesmosterol  | 8-DHD     | 0.0817                    | 0.0289*     | 8-DHD       | 0.0002***   | 0.0094**    |                           |  | 8-DHD       | 0.0219*     | 0.1488      |                           |  | 8-DHD       | <0.0001**** | <0.0001**** |                           |  | 8-DHD       | <0.0001**** | <0.0001**** |                           |  |
|                      | 7-dehydrodesmosterol  | 7-DHD     | <0.0001****               | 0.0006***   | 7-DHD       | <0.0001**** | <0.0001**** |                           |  | 7-DHD       | 0.0004***   | 0.0003***   |                           |  | 7-DHD       | <0.0001**** | <0.0001**** |                           |  | 7-DHD       | <0.0001**** | <0.0001**** |                           |  |
|                      | Desmosterol           | DES       | 0.0029**                  | 0.1585      | DES         | <0.0001**** | 0.0003***   |                           |  | DES         | <0.0001**** | 0.0002***   |                           |  | DES         | <0.0001**** | <0.0001**** |                           |  | DES         | <0.0001**** | <0.0001**** |                           |  |
| Kandutsch<br>Russell | dihydrolanosterol     | DIHLAN    | 0.5432                    | 0.1130      | DIHLAN      | 0.2767      | 0.7318      |                           |  | DIHLAN      | 0.2216      | 0.0348*     |                           |  | DIHLAN      | 0.0865      | 0.9878      |                           |  | DIHLAN      | 0.0121*     | 0.0224*     |                           |  |
|                      | 14-dehydrozymostenol  | 14-DZYME  | 0.0031**                  | 0.0619      | 14-DZYME    | <0.0001**** | <0.0001**** |                           |  | 14-DZYME    | <0.0001**** | <0.0001**** |                           |  | 14-DZYME    |             |             |                           |  | 14-DZYME    | <0.0001**** | <0.0001**** |                           |  |
|                      | Zymostenol            | ZYME      | <0.0001****               | 0.0005***   | ZYME        | 0.0024**    | 0.0213*     |                           |  | ZYME        | 0.0020**    | 0.0086**    |                           |  | ZYME        | 0.4914      | 0.8678      |                           |  | ZYME        | 0.0974      | 0.0195*     |                           |  |
|                      | Lathosterol           | LATH      | <0.0001****               | 0.0023**    | LATH        | 0.2013      | 0.0027**    |                           |  | LATH        | 0.0010***   | 0.0165*     |                           |  | LATH        | 0.0363*     | 0.0030**    |                           |  | LATH        | 0.0226*     | 0.0784      |                           |  |
|                      | 7-dehydrocholesterol  | 7-DHC     | <0.0001****               | <0.0001**** | 7-DHC       | <0.0001**** | <0.0001**** |                           |  |
|                      | 8-dehydrocholesterol  | 8-DHC     | <0.0001****               | <0.0001**** | 8-DHC       | 0.0001***   | 0.0013**    |                           |  | 8-DHC       | <0.0001**** | 0.0004***   |                           |  | 8-DHC       | <0.0001**** | <0.0001**** |                           |  | 8-DHC       | <0.0001**** | <0.0001**** |                           |  |
|                      | Cholesterol           | CHOL      | 0.6821                    | 0.0316*     | CHOL        | 0.052       | 0.0752      |                           |  | CHOL        | 0.1413      | 0.1635      |                           |  | CHOL        | 0.4317      | 0.6333      |                           |  | CHOL        | 0.1941      | 0.6886      |                           |  |
| Oxysterols           | 7-keto cholesterol    | 7-KETO    | 0.2030                    | 0.4716      | 7-KETO      | 0.0888      | 0.0568      |                           |  | 7-KETO      | 0.0255*     | 0.3572      |                           |  | 7-KETO      | 0.7164      | 0.1415      |                           |  | 7-KETO      | 0.7205      | 0.9739      |                           |  |
|                      | 24OH-cholesterol      | 24OH-CHOL |                           |             | 24OH-CHOL   |             |             |                           |  | 24OH-CHOL   |             |             |                           |  | 24OH-CHOL   | 0.4020      | 0.2160      |                           |  | 24OH-CHOL   | 0.8268      | 0.6244      |                           |  |
|                      | 25OH-cholesterol      | 25OH-CHOL | 0.2170                    | 0.6723      | 25OH-CHOL   | 0.0573      | 0.5319      |                           |  | 25OH-CHOL   | 0.0318*     | 0.0949      |                           |  | 25OH-CHOL   | 0.3028      | 0.1215      |                           |  | 25OH-CHOL   | 0.6335      | 0.8319      |                           |  |
|                      | 27OH-cholesterol      | 27OH-CHOL | 0.5418                    | 0.7223      | 27OH-CHOL   | 0.0527      | 0.3227      |                           |  | 27OH-CHOL   | <0.0001**** | 0.0265*     |                           |  | 27OH-CHOL   | 0.9488      | 0.1789      |                           |  | 27OH-CHOL   | 0.9336      | 0.1760      |                           |  |
|                      | β-epoxycholesterol    | β-EP CHOL | 0.9362                    | 0.3933      | β-EP CHOL   | 0.3049      | 0.9782      |                           |  | β-EP CHOL   | 0.8614      | 0.2290      |                           |  | β-EP CHOL   | 0.6782      | 0.2660      |                           |  | β-EP CHOL   |             |             |                           |  |

t-test here comparing Male VEH vs Male ARI+TR and Female VEH vs Female ARI+TRZ

Table S5. Sterols and oxysterol levels (Mean±SEM) in serum and organs in male and female VEH and ARI+TRZ exposed mice.
